# Supplementary material for: A new look at the chalcogen bond: π-hole-based chalcogen (Se, Te) bonding which does not include a σ-hole interaction
Source: Royal Society of Chemistry journal article supplement (doi:10.1039/d3qi00087g), 2023-01-01
Supplement: d3qi00087g1.pdf [file d3qi00087g1.pdf]

## ELECTRONIC SUPPLEMENTARY MATERIALS

### **A New Look at the Chalcogen Bond: $\pi$ -Hole-based Chalcogen (Se, Te) Bonding Which Does Not Include a $\sigma$ -Hole Interaction**

Eugene A. Katlenok,\*<sup>1</sup> Maxim L. Kuznetsov,<sup>2</sup> Nikolay A. Semenov,<sup>3</sup> Nadezhda A. Bokach,<sup>1</sup>

Vadim Yu. Kukushkin\*<sup>1,4</sup>

<sup>1</sup>*Institute of Chemistry, Saint Petersburg State University, Universitetskaya Nab. 7/9, 199034 Saint Petersburg, Russian Federation; e-mail: [v.kukushkin@spbu.ru](mailto:v.kukushkin@spbu.ru)*

<sup>2</sup>*Centro de Química Estrutural, Institute of Molecular Sciences, Departamento de Engenharia Química, Instituto Superior Técnico, Universidade de Lisboa, Av. Rovisco Pais, 1049-001 Lisboa, Portugal*

<sup>3</sup>*Institute of Organic Chemistry, Siberian Branch, Russian Academy of Sciences, 9 Lavrentiev Avenue, 630090 Novosibirsk, Russian Federation*

<sup>4</sup>*Laboratory of Crystal Engineering of Functional Materials, South Ural State University, 76, Lenin Av., 454080 Chelyabinsk, Russian Federation*

## Contents

|                                                                                                          |    |
|----------------------------------------------------------------------------------------------------------|----|
| 1. Crystal data and structure refinement.....                                                            | 3  |
| 1.1. Structural features of <b>1</b> ·3SeDA·CH <sub>2</sub> Cl <sub>2</sub> and <b>1</b> ·3TeDA·THF..... | 4  |
| 1.2. Structural features of <b>2</b> ·2SeDA·2H <sub>2</sub> O·CH <sub>2</sub> Cl <sub>2</sub> .....      | 7  |
| 1.3. Structural features of <b>3</b> ·2SeDA.....                                                         | 9  |
| 2. Computational details.....                                                                            | 11 |
| 2.1. Calculations of interaction energy for the Pt···Ch contact in [ <b>1</b> ·TeDA].....                | 11 |
| 2.2. MEP and geometric parameters of optimized clusters.....                                             | 11 |
| 2.2. QTAIM.....                                                                                          | 14 |
| 2.3. ETS-NOCV/CDF.....                                                                                   | 15 |
| 3. Cartesian coordinates for the studied molecules.....                                                  | 19 |
| Cartesian coordinate for <b>1</b> (in Å).....                                                            | 19 |
| Cartesian coordinate for <b>2</b> (in Å).....                                                            | 20 |
| Cartesian coordinate for <b>3</b> (in Å).....                                                            | 21 |
| Cartesian coordinate for SeDA (in Å).....                                                                | 21 |
| Cartesian coordinate for TeDA (in Å).....                                                                | 21 |
| Cartesian coordinate for [ <b>1</b> ·TeDA] (in Å).....                                                   | 21 |
| Cartesian coordinate for [ <b>1</b> ·SeDA] (in Å).....                                                   | 23 |
| Cartesian coordinate for [ <b>2</b> ·SeDA] (in Å).....                                                   | 24 |
| Cartesian coordinate for [ <b>3</b> ·SeDA] (in Å).....                                                   | 25 |
| Cartesian coordinate for [ <b>1</b> ·SeDA] <sub>σ</sub> (in Å).....                                      | 25 |
| 4. NMR data.....                                                                                         | 27 |
| 5. References.....                                                                                       | 30 |

# 1. Crystal data and structure refinement

**Table S1.** Crystal data and structure refinement for **1·3TeDA·THF**, **1·3SeDA·CH<sub>2</sub>Cl<sub>2</sub>**, **2·2SeDA·2H<sub>2</sub>O·CH<sub>2</sub>Cl<sub>2</sub>**, and **3·2SeDA**.

| Identification code                         | 1·3TeDA·THF                                                                                     | 1·3SeDA·CH <sub>2</sub> Cl <sub>2</sub>                                                                        | 2·2SeDA·2H <sub>2</sub> O·CH <sub>2</sub> Cl <sub>2</sub>                                                                     | 3·2SeDA                                                                           |
|---------------------------------------------|-------------------------------------------------------------------------------------------------|----------------------------------------------------------------------------------------------------------------|-------------------------------------------------------------------------------------------------------------------------------|-----------------------------------------------------------------------------------|
| Empirical formula                           | C <sub>50</sub> H <sub>34</sub> N <sub>18</sub> OPt <sub>2</sub> S <sub>4</sub> Te <sub>3</sub> | C <sub>47</sub> H <sub>28</sub> Cl <sub>2</sub> N <sub>18</sub> Pt <sub>2</sub> S <sub>4</sub> Se <sub>3</sub> | C <sub>45</sub> H <sub>30</sub> Cl <sub>2</sub> N <sub>12</sub> O <sub>2</sub> Pt <sub>2</sub> S <sub>4</sub> Se <sub>2</sub> | C <sub>26</sub> H <sub>12</sub> N <sub>10</sub> OPtS <sub>2</sub> Se <sub>2</sub> |
| Formula weight                              | 1804.17                                                                                         | 1671.07                                                                                                        | 1518.05                                                                                                                       | 897.59                                                                            |
| Temperature/K                               | 100(2)                                                                                          | 100(2)                                                                                                         | 100(2)                                                                                                                        | 100(2)                                                                            |
| Crystal system                              | monoclinic                                                                                      | monoclinic                                                                                                     | monoclinic                                                                                                                    | monoclinic                                                                        |
| Space group                                 | P2 <sub>1</sub> /c                                                                              | P2 <sub>1</sub> /c                                                                                             | I2/a                                                                                                                          | P2 <sub>1</sub> /c                                                                |
| a/Å                                         | 9.88596(10)                                                                                     | 9.95820(10)                                                                                                    | 14.3494(2)                                                                                                                    | 17.42591(13)                                                                      |
| b/Å                                         | 26.2733(3)                                                                                      | 26.3182(2)                                                                                                     | 16.1541(2)                                                                                                                    | 7.83162(7)                                                                        |
| c/Å                                         | 20.9857(2)                                                                                      | 20.9412(2)                                                                                                     | 20.5667(2)                                                                                                                    | 20.84877(19)                                                                      |
| α/°                                         | 90                                                                                              | 90                                                                                                             | 90                                                                                                                            | 90                                                                                |
| β/°                                         | 98.3721(10)                                                                                     | 96.3630(10)                                                                                                    | 95.2320(10)                                                                                                                   | 100.6242(8)                                                                       |
| γ/°                                         | 90                                                                                              | 90                                                                                                             | 90                                                                                                                            | 90                                                                                |
| Volume/Å <sup>3</sup>                       | 5392.67(10)                                                                                     | 5454.50(9)                                                                                                     | 4747.53(10)                                                                                                                   | 2796.52(4)                                                                        |
| Z                                           | 4                                                                                               | 4                                                                                                              | 4                                                                                                                             | 4                                                                                 |
| ρ <sub>calc</sub> /g/cm <sup>3</sup>        | 2.222                                                                                           | 2.035                                                                                                          | 2.124                                                                                                                         | 2.132                                                                             |
| μ/mm <sup>-1</sup>                          | 24.041                                                                                          | 14.521                                                                                                         | 15.748                                                                                                                        | 14.12                                                                             |
| F(000)                                      | 3376                                                                                            | 3168                                                                                                           | 2888                                                                                                                          | 1696                                                                              |
| Crystal size/mm <sup>3</sup>                | 0.08 × 0.06 × 0.05                                                                              | 0.13 × 0.11 × 0.08                                                                                             | 0.06 × 0.04 × 0.03                                                                                                            | 0.1 × 0.08 × 0.07                                                                 |
| Radiation                                   | Cu Kα (λ = 1.54184)                                                                             | CuKα (λ = 1.54184)                                                                                             | Cu Kα (λ = 1.54184)                                                                                                           | Cu Kα (λ = 1.54184)                                                               |
| 2θ range for data collection/°              | 5.426 to 139.998                                                                                | 5.414 to 139.94                                                                                                | 6.97 to 154.008                                                                                                               | 5.16 to 139.998                                                                   |
| Index ranges                                | -9 ≤ h ≤ 12, -32 ≤ k ≤ 31, -24 ≤ l ≤ 25                                                         | -12 ≤ h ≤ 12, -32 ≤ k ≤ 32, -24 ≤ l ≤ 25                                                                       | -18 ≤ h ≤ 18, -10 ≤ k ≤ 20, -23 ≤ l ≤ 25                                                                                      | -18 ≤ h ≤ 21, -9 ≤ k ≤ 9, -25 ≤ l ≤ 25                                            |
| Reflections collected                       | 38723                                                                                           | 22131                                                                                                          | 15496                                                                                                                         | 32290                                                                             |
| Independent reflections                     | 10127 [R <sub>int</sub> = 0.0406, R <sub>sigma</sub> = 0.0342]                                  | 22131 [R <sub>int</sub> = n/a, R <sub>sigma</sub> = 0.0263]                                                    | 4801 [R <sub>int</sub> = 0.0270, R <sub>sigma</sub> = 0.0254]                                                                 | 5307 [R <sub>int</sub> = 0.0473, R <sub>sigma</sub> = 0.0292]                     |
| Data/restraints/parameters                  | 10127/0/705                                                                                     | 22131/0/688                                                                                                    | 4801/0/315                                                                                                                    | 5307/0/379                                                                        |
| Goodness-of-fit on F <sup>2</sup>           | 1.015                                                                                           | 1.05                                                                                                           | 1.026                                                                                                                         | 1.039                                                                             |
| Final R indexes [I ≥ 2σ (I)]                | R <sub>1</sub> = 0.0278, wR <sub>2</sub> = 0.0660                                               | R <sub>1</sub> = 0.0564, wR <sub>2</sub> = 0.1581                                                              | R <sub>1</sub> = 0.0256, wR <sub>2</sub> = 0.0671                                                                             | R <sub>1</sub> = 0.0223, wR <sub>2</sub> = 0.0516                                 |
| Final R indexes [all data]                  | R <sub>1</sub> = 0.0317, wR <sub>2</sub> = 0.0678                                               | R <sub>1</sub> = 0.0641, wR <sub>2</sub> = 0.1647                                                              | R <sub>1</sub> = 0.0271, wR <sub>2</sub> = 0.0680                                                                             | R <sub>1</sub> = 0.0250, wR <sub>2</sub> = 0.0526                                 |
| Largest diff. peak/hole / e Å <sup>-3</sup> | 1.57/-0.99                                                                                      | 1.41/-3.56                                                                                                     | 1.30/-1.12                                                                                                                    | 1.08/-0.94                                                                        |
| CCDC Nos                                    | 2218816                                                                                         | 2218817                                                                                                        | 2218818                                                                                                                       | 2218819                                                                           |

1.1. Structural features of  $1 \cdot 3\text{SeDA} \cdot \text{CH}_2\text{Cl}_2$  and  $1 \cdot 3\text{TeDA} \cdot \text{THF}$

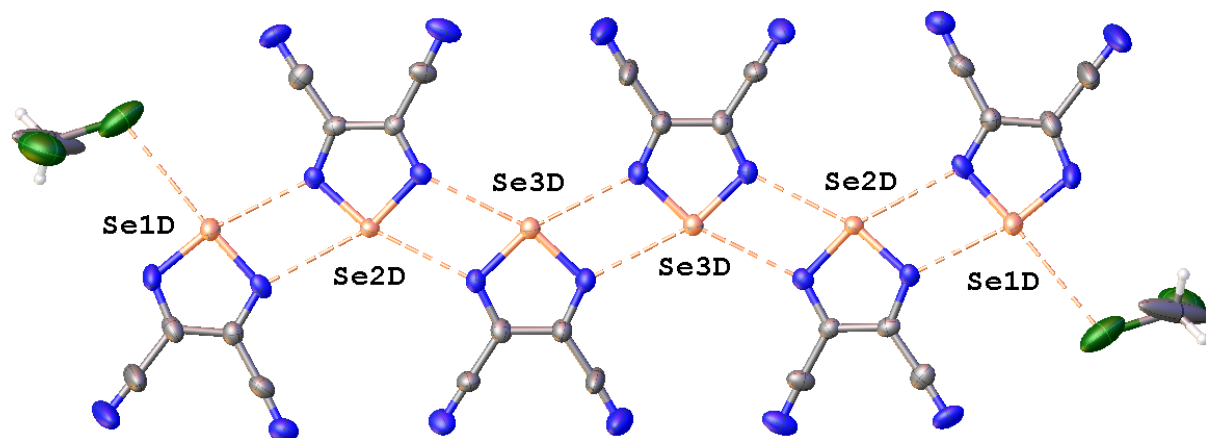

**Figure S1.** View of the supramolecular heterooctamer in the crystal structure of  $1 \cdot 3\text{SeDA} \cdot \text{CH}_2\text{Cl}_2$ .

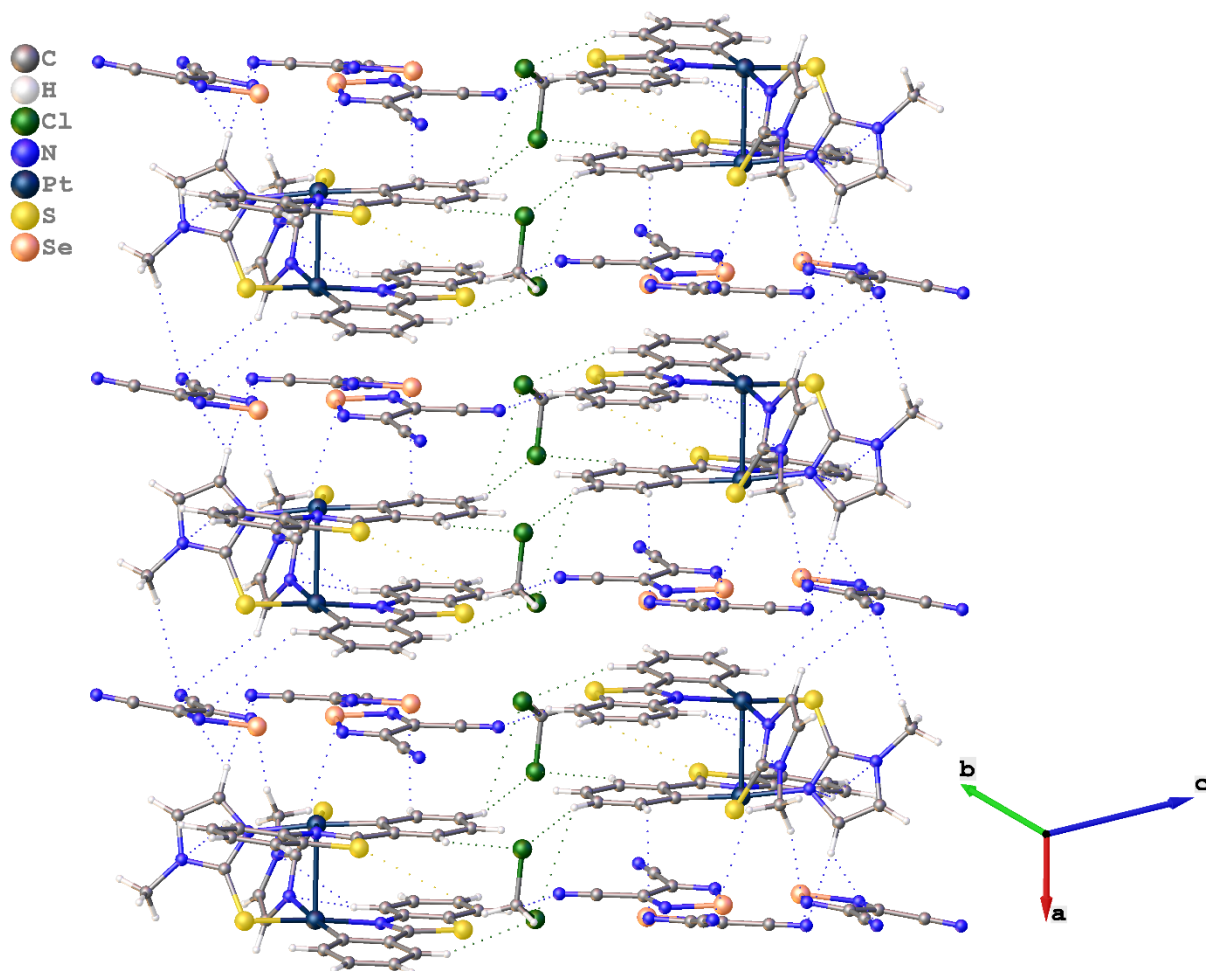

**Figure S2.** A fragment of the crystal packing of  $1 \cdot 3\text{SeDA} \cdot \text{CH}_2\text{Cl}_2$  illustrating the occurred 3D-network.

**Table S2.** Parameters of short intermolecular contacts (other than HBs) in the crystal structure of **1·3SeDA·CH<sub>2</sub>Cl<sub>2</sub>**.

| Contact                                  | Distance, Å (Nc <sup>a</sup> ) | Angle, °                                                                               | Other parameters and comments                                                                                                                        |
|------------------------------------------|--------------------------------|----------------------------------------------------------------------------------------|------------------------------------------------------------------------------------------------------------------------------------------------------|
| Se1D···Cl2S                              | 3.379(5) (0.93)                | N1D–Se1D–Cl2S 174.6(3)<br>Se1D–Cl2S–C1S 109.0(8)                                       | Se···Cl ChB with C <sub>4</sub> N <sub>4</sub> Se-1 donor                                                                                            |
| Se1D···N5D                               | 2.751(7) (0.80)                | N1D–Se1D–N5D 165.7(3)                                                                  | Se···N ChB with SeDA-1 donor                                                                                                                         |
| Se2D···N2D                               | 2.941(8) (0.85)                | N6D–Se2D–N2D 161.0(3)                                                                  | Se···N ChB with SeDA-2 donor                                                                                                                         |
| Se2D···N9D                               | 2.822(6) (0.82)                | N5D–Se2D–N9D 164.4(3)                                                                  | Se···N ChB with SeDA-2 donor                                                                                                                         |
| Se3D···N6D                               | 2.898(8) (0.84)                | N6D–Se3D–<br>N10D 162.9(3)                                                             | Se···N ChB with SeDA-3 donor                                                                                                                         |
| Se3D···N10D                              | 2.883(7) (0.84)                | N9D–Se3D–<br>N10D 163.1(3)                                                             | Se···N ChB with SeDA-3 donor                                                                                                                         |
| Pt1···Se2D                               | 3.6473(10) (1.00)              | (C <sub>2</sub> N <sub>2</sub> Se) <sub>plane centroid</sub> –Se2D–<br>Pt1D 100.97(13) | π-(Se)-hole···Pt contact, supported by π–π stacking between SeDA and bt ligand (C <sub>3</sub> N <sub>plane</sub> ) (interplane distance 3.308(5)Å)  |
| Se2D···Pt2                               | 3.5070(9) (0.96)               | (C <sub>2</sub> N <sub>2</sub> Se) <sub>plane centroid</sub> –Se2D–<br>Pt2 101.17(13)  | π-(Se)-hole···Pt contact, supported by π–π stacking between SeDA and bt ligand (C <sub>3</sub> N <sub>plane</sub> ) (interplane distance 3.284(5) Å) |
| Se3D–C <sub>6</sub> H <sub>4</sub> plane | 3.299(4)                       |                                                                                        | π-(Se)-hole···C <sub>6</sub> H <sub>4</sub> plane contact between SeDA-3 and C <sub>6</sub> H <sub>4</sub> from bt ligand                            |

<sup>a</sup>Normalized contact (Nc) is defined as the ratio between the separation observed in the crystal and  $\sum_{vdw}$  of interacting atoms:  $Nc = d/\sum_{vdw}$ ;  $\sum_{vdw}(Se+Pt) = 3.65$  Å,  $\sum_{vdw}(Se+N) = 3.45$  Å,  $\sum_{vdw}(Se+Cl) = 3.65$  Å,  $\sum_{vdw}(Se+S) = 3.70$  Å,  $\sum_{vdw}(Se+C) = 3.60$  Å.

**Table S3.** Parameters of short intermolecular contacts (other than HBs) in the crystal structure of 1·3TeDA·THF.

| Contact                                  | Distance, Å (Nc <sup>a</sup> ) | Angle, °                                                                            | Other parameters and comments                                                                                                                             |
|------------------------------------------|--------------------------------|-------------------------------------------------------------------------------------|-----------------------------------------------------------------------------------------------------------------------------------------------------------|
| Te3D···O1S                               | 2.744(4) (0.77)                | N9D–Te1D–<br>O1S 159.05(14)                                                         | Te···O ChB with<br>TeDA-3 donor                                                                                                                           |
| Te3D···N5D                               | 2.694(4) (0.75)                | N1D–Te3D–<br>N10D 153.16(4)                                                         | Te···N ChB with<br>TeDA-3 donor                                                                                                                           |
| Te1D···N9D                               | 2.729(4) (0.76)                | N9D–Te2D–<br>N2D 152.44(13)                                                         | Te···N ChB with<br>TeDA-1 donor                                                                                                                           |
| Te1D···N5D                               | 2.671(4) (0.74)                | N5D–Te2D–<br>N1D 151.80(14)                                                         | Te···N ChB with<br>TeDA-1 donor                                                                                                                           |
| Te2D···N2D                               | 2.651(4) (0.73)                | N2D–Te2D–<br>N6D 150.98(13)                                                         | Te···N ChB with<br>TeDA-2 donor                                                                                                                           |
| Te2D···N6D                               | 2.726(4) (0.76)                | N6D–Te2D–<br>N10D 150.77(13)                                                        | Te···N ChB with<br>TeDA-2 donor                                                                                                                           |
| Te1D···Pt1                               | 3.3767(4) (0.89)               | (C <sub>2</sub> N <sub>2</sub> Te) <sub>plane centroid</sub> –Te1D–<br>Pt1 93.99(6) | π-(Te)-hole···Pt<br>contact,<br>supported by π-π<br>stacking between<br>TeDA and bt ligand<br>(C <sub>3</sub> Nplane) (interplane<br>distance 3.242(3)Å)  |
| Te1D···Pt2                               | 3.5636(4) (0.94)               | (C <sub>2</sub> N <sub>2</sub> Te) <sub>plane centroid</sub> –Te1D–<br>Pt2 92.36(6) | π-(Te)-hole···Pt<br>contact,<br>supported by π-π<br>stacking between<br>TeDA and bt ligand<br>(C <sub>3</sub> Nplane) (interplane<br>distance 3.295(3) Å) |
| Te3D–C <sub>6</sub> H <sub>4</sub> plane | 3.316(2)                       |                                                                                     | π-(Te)-hole···C <sub>6</sub> H <sub>4</sub> plane<br>contact between<br>TeDA-3 and C <sub>6</sub> H <sub>4</sub><br>from bt ligand                        |

<sup>a</sup>The Normalized contact (Nc) is defined as the ratio between the separation observed in the crystal and  $\sum_{vdw}$  of interacting atoms:  $Nc = d/\sum_{vdw}$ ;  $\sum_{vdw}(Se+Pt) = 3.81$  Å,  $\sum_{vdw}(Te+N) = 3.61$  Å,  $\sum_{vdw}(Te+O) = 3.58$  Å.

1.2. Structural features of 2·2SeDA·2H<sub>2</sub>O·CH<sub>2</sub>Cl<sub>2</sub>

**Table S4.** Parameters of short intermolecular contacts (other than HBs) in the crystal structure of 2·2SeDA·2H<sub>2</sub>O·CH<sub>2</sub>Cl<sub>2</sub>.

| Contact                                                                                               | Distance, Å (Nc <sup>a</sup> )  | Angle, °                                                                              | Other parameters and comments                                                                                                                                                                        |
|-------------------------------------------------------------------------------------------------------|---------------------------------|---------------------------------------------------------------------------------------|------------------------------------------------------------------------------------------------------------------------------------------------------------------------------------------------------|
| Se1D···N1D                                                                                            | 2.916(3) (0.85)                 | N1D–Se1D–<br>N2D 165.26(12)                                                           | Se···N ChB                                                                                                                                                                                           |
| Se1D···O1S                                                                                            | 2.758(5) (0.81)                 | O1S–Se1D–N1D<br>172.85(13)                                                            | Se···O ChB                                                                                                                                                                                           |
| Pt1···Se1D                                                                                            | 3.3661(6) (0.92)                | (C <sub>2</sub> N <sub>2</sub> Se) <sub>plane centroid</sub> –Se1D–<br>Pt1D 104.19(6) | πh(Se)···Pt contact,<br>supported by π–π<br>stacking between<br>C <sub>2</sub> N <sub>2</sub> Se and <i>o</i> -C <sub>6</sub> H <sub>4</sub><br>from bt ligand<br>(interplane distance<br>3.387(3)Å) |
| C <sub>2</sub> N <sub>2</sub> Se <sub>plane</sub> –<br>C <sub>6</sub> H <sub>4</sub> <sub>plane</sub> | interplane distance<br>3.419(3) |                                                                                       | π–π stacking between<br>C <sub>2</sub> N <sub>2</sub> Se and C <sub>6</sub> H <sub>4</sub> from<br>bt ligand, accompanied<br>by the Se···(C,S)<br>contact (interatomic<br>distances ca. 3.70 Å)      |

<sup>a</sup>Normalized contact (Nc) is defined as the ratio between the separation observed in the crystal and  $\sum_{\text{vdw}}$  of interacting atoms:  $Nc = d/\sum_{\text{vdw}}$ ;  $\sum_{\text{vdw}}(\text{Se+Pt}) = 3.65 \text{ \AA}$ ,  $\sum_{\text{vdw}}(\text{Se+N}) = 3.45 \text{ \AA}$ ,  $\sum_{\text{vdw}}(\text{Se+O}) = 3.42 \text{ \AA}$ ,  $\sum_{\text{vdw}}(\text{Se+S}) = 3.70 \text{ \AA}$ ,  $\sum_{\text{vdw}}(\text{Se+C}) = 3.60 \text{ \AA}$ .

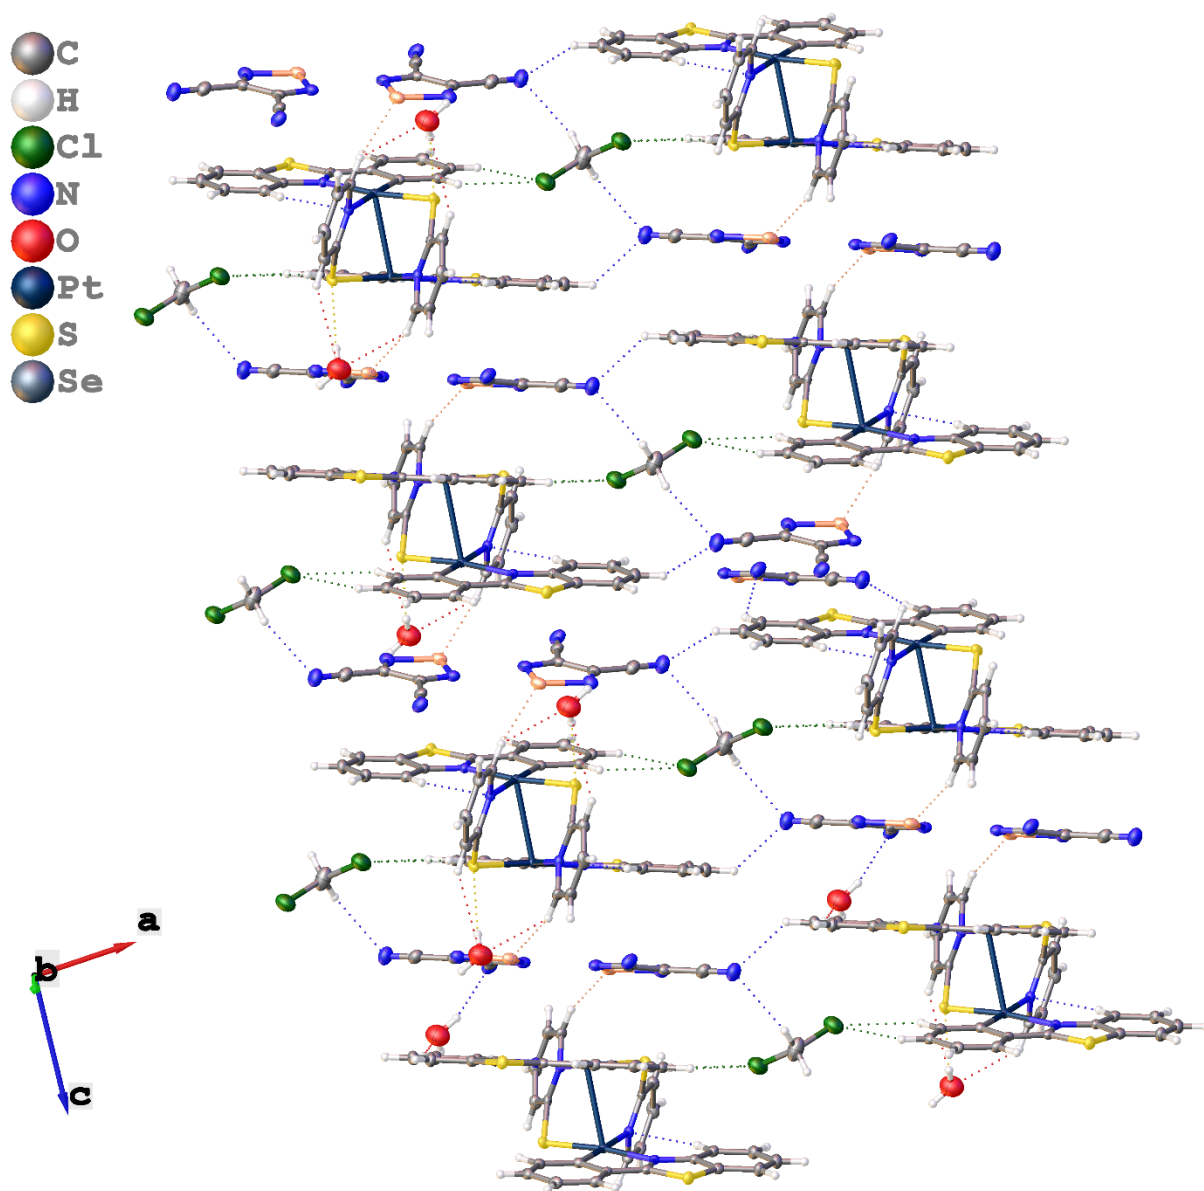

**Figure S3.** A fragment of the crystal packing of  $1 \cdot 3\text{SeDA} \cdot \text{CH}_2\text{Cl}_2$  illustrating the occurrence of the 3D-network.



### 1.3. Structural features of 3·2SeDA

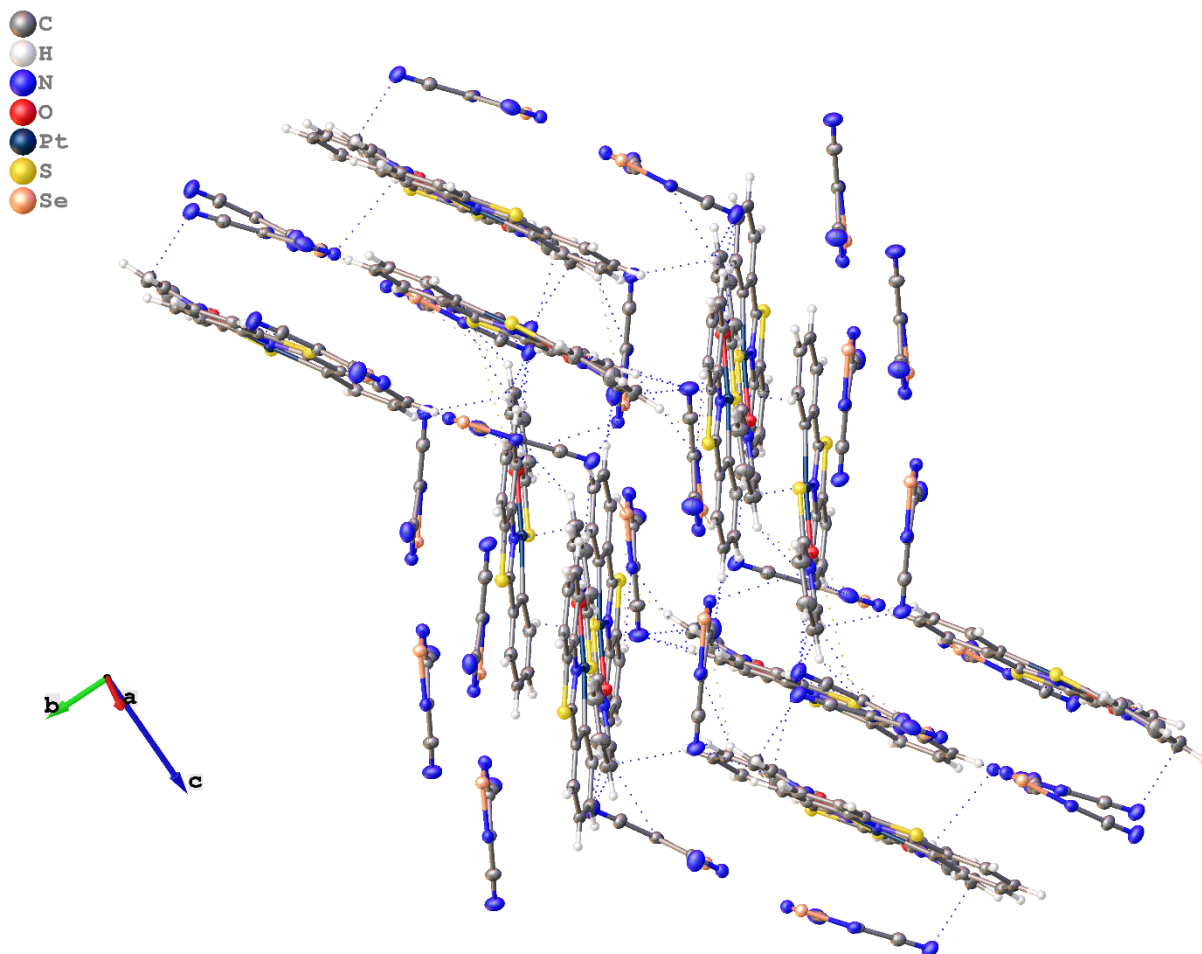

**Figure S4.** A fragment of the crystal packing of 3·2SeDA illustrating the occurrence of the 3D-network.

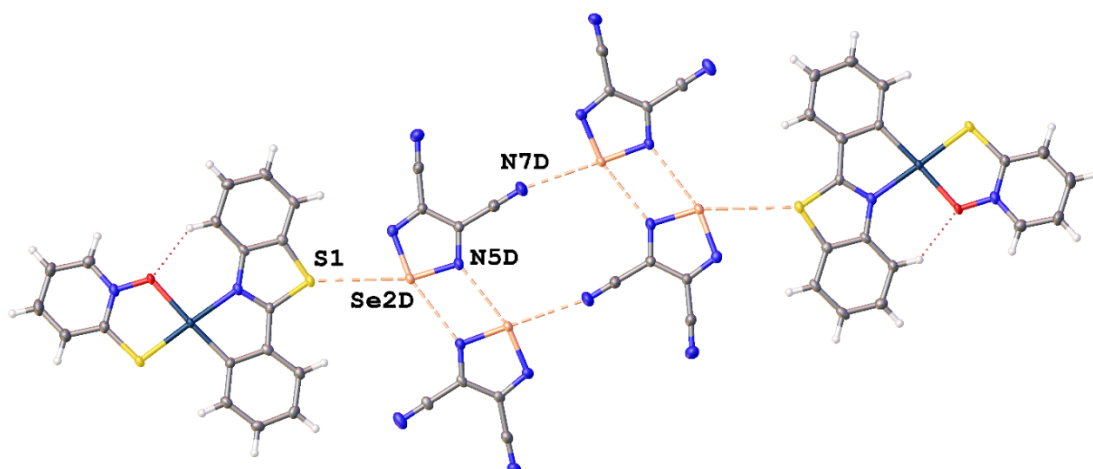

**Figure S5.** View of the supramolecular heterohexamer in the crystal structure of 3·2SeDA.

**Table S5.** Parameters of short intermolecular contacts (other than HBs) in the crystal structure of 3·2SeDA.

| Contact    | Distance, Å (Nc <sup>a</sup> ) | Angle, °                                                                            | Other parameters and comments                                                                                                   |
|------------|--------------------------------|-------------------------------------------------------------------------------------|---------------------------------------------------------------------------------------------------------------------------------|
| Se1D···N5D | 2.813(3) (0.82)                | N1D–Se1D–<br>N5D 162.56(10)                                                         | Se···N ChB                                                                                                                      |
| Se2D···N2D | 2.911(3) (0.84)                | N6D–Se2D–<br>N2D 162.85(10)                                                         | Se···N ChB                                                                                                                      |
| Se1D···N7D | 2.965(3) (0.86)                | N2D–Se1D–<br>N7D 177.86(11)                                                         | Se···N ChB                                                                                                                      |
| Se2D···S1  | 3.5301(8) (0.95)               | N5D–Se2D–S1 164.17(10)                                                              | Se···S ChB                                                                                                                      |
| Se2D···Pt1 | 3.3737(4) (0.92)               | (C <sub>2</sub> N <sub>2</sub> Se) <sub>plane centroid</sub> –Se2D–<br>Pt1 89.24(5) | π-(Se)-hole···Pt<br>contact,<br>supported by π–π<br>stacking between<br>SeDA and OPyt ligand<br>(S2–C5D distance<br>3.321(3) Å) |

<sup>a</sup>The Normalized contact (Nc) is defined as the ratio between the separation observed in the crystal and  $\sum_{vdw}$  of interacting atoms:  $Nc = d/\sum_{vdw}$ ;  $\sum_{vdw}(Se+Pt) = 3.65$  Å,  $\sum_{vdw}(Se+N) = 3.45$  Å,  $\sum_{vdw}(Se+S) = 3.70$  Å.

**Table S6.** Pt–Pt bond lengths.

| Complex                                     | Pt–Pt, Å               |
|---------------------------------------------|------------------------|
| <b>1</b>                                    | 2.9327(4)<br>2.9202(4) |
| <b>2</b>                                    | 2.8764(4)              |
| <b>1·3TeDA·THF</b>                          | 2.9572(3)              |
| <b>1·3SeDA·CH<sub>2</sub>Cl<sub>2</sub></b> | 2.9463(4)              |
| <b>2·4SeDA·H<sub>2</sub>O</b>               | 2.9064(8)              |

## 2. Computational details

### 2.1. Calculations of interaction energy for the Pt···Ch contact in [1·TeDA]

Apart from the Te···Pt bonding, in structure [1·TeDA], a short contact (Å) and corresponding BCP were detected between Te and an H atom of one of the imidazolethiole ligands (Figure S8,a). Therefore, the  $\Sigma E_{\text{int}}^{\text{SM}} - E_{\text{int}}(\text{C}\cdots\text{C/S})^{\text{SM}}$  difference for this structures is the sum of interaction energies of the Te···Pt and H···Te bonds,  $E_{\text{int}}(\text{Te}\cdots\text{Pt})$  and  $E_{\text{int}}(\text{H}\cdots\text{Te})$ , respectively. The  $E_{\text{int}}(\text{H}\cdots\text{Te})$  value of  $-1.2$  kcal/mol was calculated using the formula of Espinosa, Molins and Lecomte<sup>1</sup> ( $E_{\text{int}}(\text{H}\cdots\text{Te})^{\text{EML}} \approx 0.5V_{\text{b}}$ ). The interaction energy for the separate Te···Pt bond given in Table 4 was calculated as  $E_{\text{int}}(\text{Te}\cdots\text{Pt})^{\text{SM}} = \Sigma E_{\text{int}}^{\text{SM}} - E_{\text{int}}(\text{C}\cdots\text{C/S})^{\text{SM}} - E_{\text{int}}(\text{H}\cdots\text{Te})^{\text{EML}}$ .

### 2.2. MEP and geometric parameters of optimized clusters

Wave-function calculations for the QTAIM, IGMH and NOCV analyses were carried out at the DFT PBE0-D3BJ/ZORA-def2-TZVP level of theory for the clusters (a) and (b) (Figure S12a. c) using crystallographic coordinates.

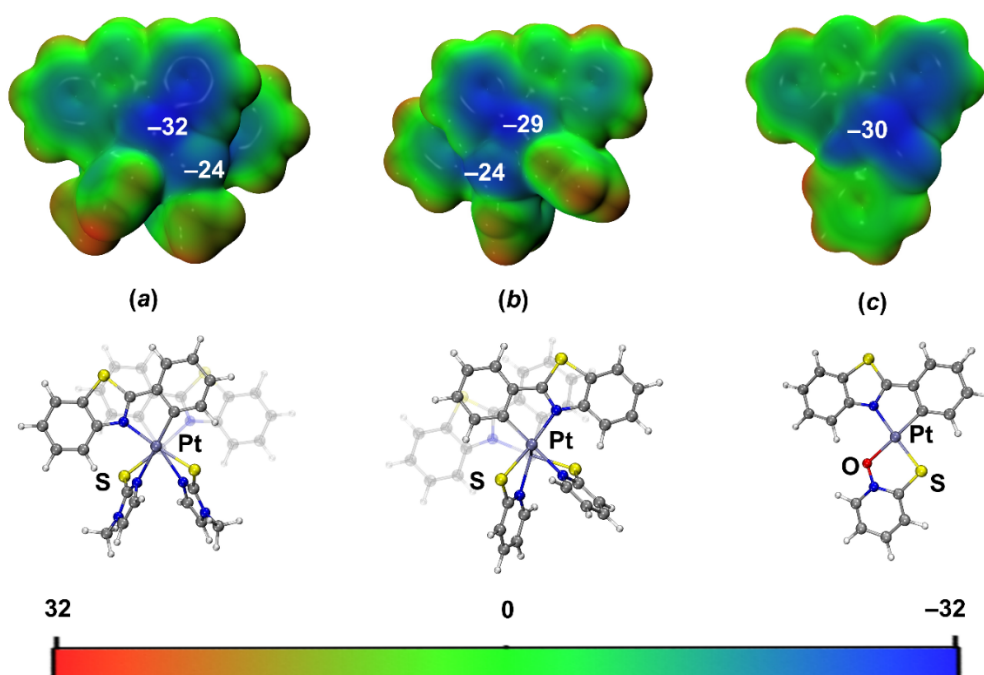

**Figure S6.** MEP distribution in 1–3 calculated for the optimized structures at the PBE0-D3BJ/ZORA-def2-TZVP level of theory (MEP values in kcal/mol).

### Approaches to characterize the positive area of ChDA

Analysis of the literature focused on ChDA indicates that there is no single terminology for characterization of the positive area ( $V_{s,\text{max}}$  of +45 (Se) and +51 (Te) kcal/mol; Figure S7) on ChDA. This region is characterized by different terms depending on the identity of interacting atom, geometry, and also molecular orbitals involved. Politzer and coauthors<sup>2, 3</sup> classified this

region as  $\pi$ -hole because the electron density depletion region is located at the position of the  $\pi^*$  orbital of ChDA. Notably, the  $\pi^*$  orbital of ChDA is delocalized over the entire molecule, but the Ch site makes a significant contribution to the formation of the  $\pi^*$  orbital.<sup>4</sup>

According to Ibrahim and Telb,<sup>5</sup> this region can be perceived as a lp-hole, since the positive region is located on the opposite side to the electron lone pair. Another terminology is based on the molecular orbitals involved. Kozuch and coauthors<sup>6</sup> suggested that interactions with a region of lower electron density (which are perpendicular to the planar fragments of the molecular framework) should be referred to as  $\pi$ -hole due to the interacting empty  $p$ -orbitals. Considering that electron density depletion region is located at the  $\pi^*$  orbital of ChDA, the  $\pi$ -hole terminology perhaps is the most accurate (or the most common) to describe the interaction occurred between of the platinum complex with ChDA and we use this terminology in our report.

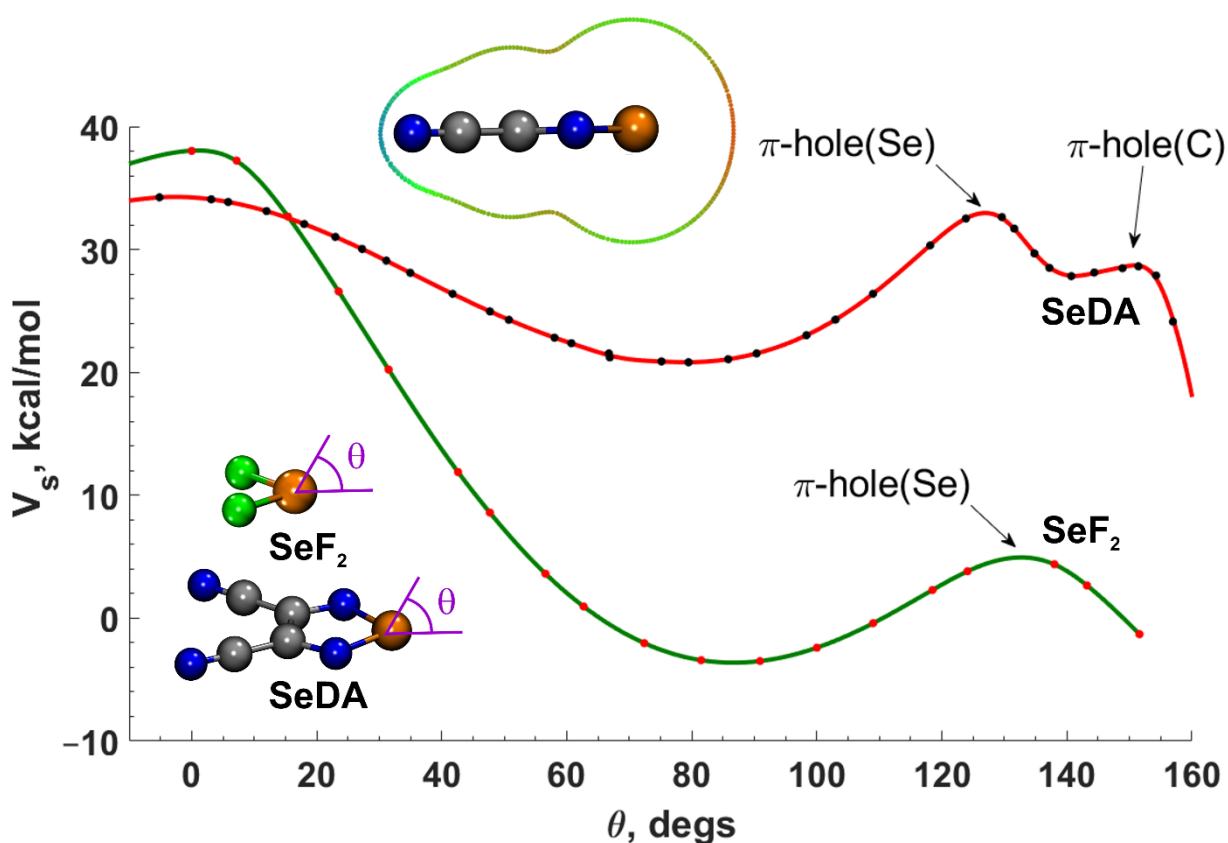

**Figure S7.** Dependence of the MEP value vs. angle  $\theta$  for SeDA and SeF<sub>2</sub> (0.001 a.u. isosurface of the electron density). Inset: MEP plot around the SeDA molecule in the plane passing via the Se atom and the middle point of the C–C bond of the diazole cycle (blue-green-red color scale  $-35 < V_s < 55$  kcal/mol).

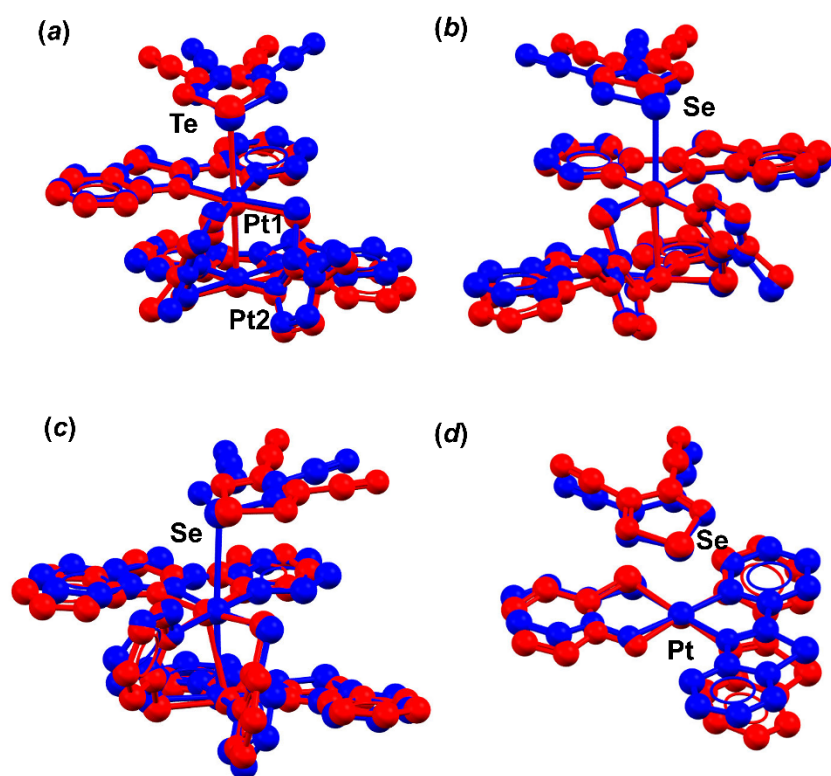

**Figure S8** Overlay images for (a) [1·TeDA]; (b) [1·SeDA]; (c) [2·SeDA]; (d) [3·SeDA] of X-ray geometry (blue) and its optimized (red) computational clusters.

**Table S7.** Geometric parameters of optimized clusters.

| Clusters | $d(\text{Ch}\cdots\text{Pt}), \text{\AA}$ | $\angle(\text{M-M-Ch}), ^\circ$ |
|----------|-------------------------------------------|---------------------------------|
| [1·TeDA] | 3.377                                     | 178                             |
| [1·SeDA] | 3.507                                     | 166                             |
| [2·SeDA] | 3.366                                     | 156                             |
| [3·SeDA] | 3.374                                     | –                               |

## 2.2. QTAIM

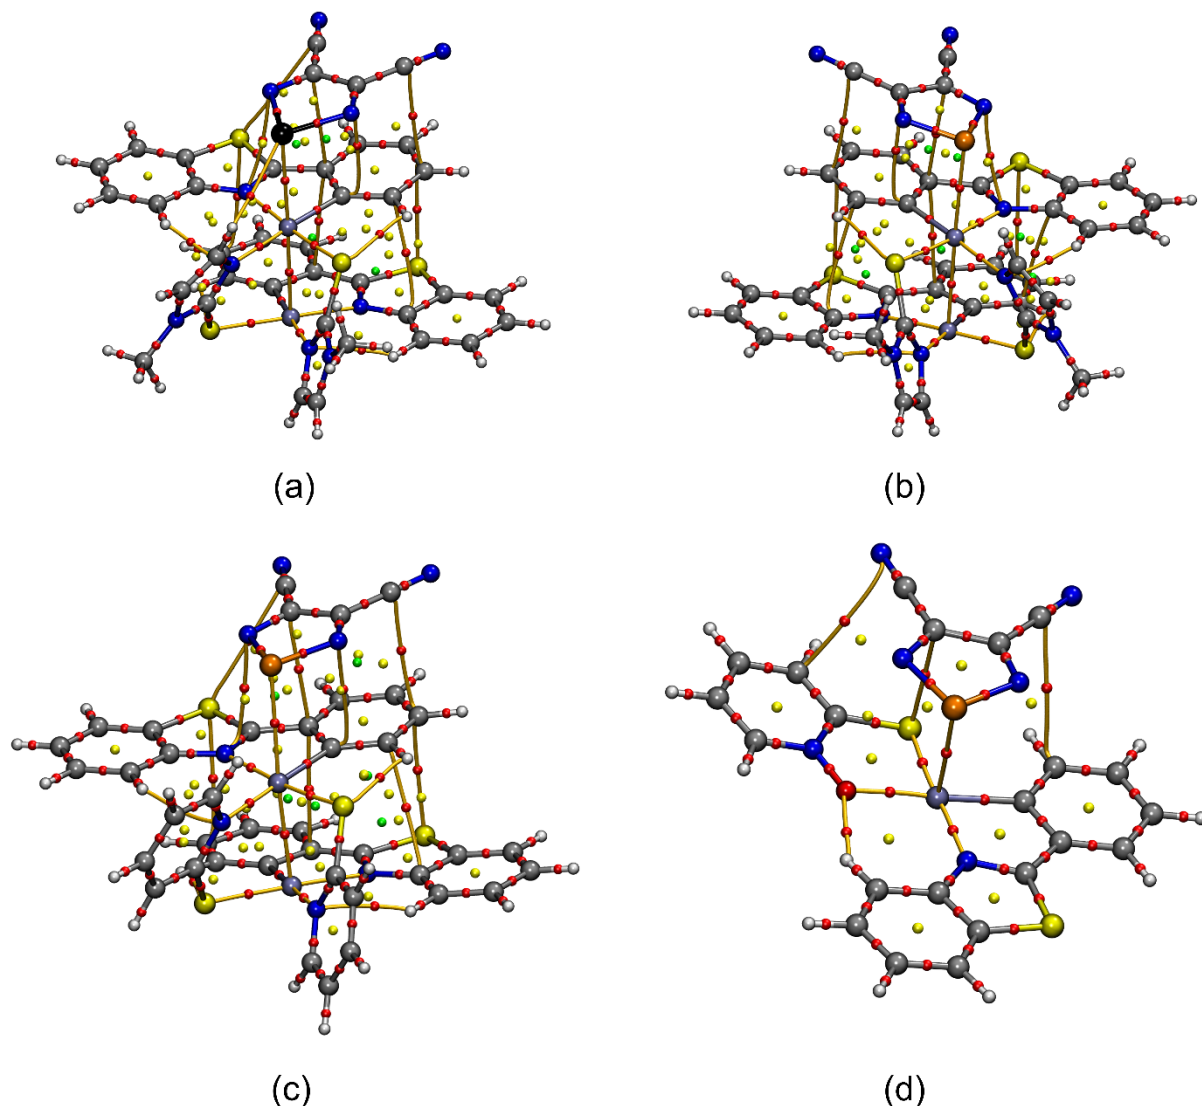

**Figure S9.** QTAIM distribution of bond, ring, and cage critical points (red, yellow, and green spheres, respectively) and bond paths for (a) [1·TeDA]; (b) [1·SeDA]; (c) [2·SeDA]; (d) [3·SeDA].

**Table S8.** Electron density ( $\rho_b$ ), its Laplacian ( $\nabla^2\rho_b$ ), potential and kinetic energy densities ( $V_b$  and  $G_b$ ), second eigenvalue of the Hessian matrix ( $\lambda_2$ ), elliptical bond index ( $\epsilon$ ), electron localization function at BCPs (in a.u.), and IBSI calculated at the PBE0-D3BJ/ZORA-def2-TZVP level of theory.

| Contact | Clusters | $\rho_b$ | $\nabla^2\rho_b$ | $V_b$   | $G_b$  | $\epsilon$ | $\lambda_2$ | ELF  | IBSI   |
|---------|----------|----------|------------------|---------|--------|------------|-------------|------|--------|
| Te···Pt | [1·TeDA] | 0.0422   | 0.055            | -0.0277 | 0.0207 | 0.03       | -0.0293     | 0.33 | 0.0729 |
| Se···Pt | [1·SeDA] | 0.0344   | 0.0635           | -0.0223 | 0.0191 | 0.05       | -0.0247     | 0.23 | 0.0561 |
| Se···Pt | [2·SeDA] | 0.0277   | 0.0528           | -0.0162 | 0.0147 | 0.07       | -0.0184     | 0.20 | 0.0432 |
| Se···Pt | [3·SeDA] | 0.0196   | 0.0418           | -0.0108 | 0.0106 | 0.02       | -0.0126     | 0.13 | 0.0290 |
| Pt···Pt | [1·TeDA] | 0.0440   | 0.092            | -0.038  | 0.0305 | 0.01       | -0.0328     | 0.21 | 0.0752 |
| Pt···Pt | [1·SeDA] | 0.0442   | 0.0977           | -0.0395 | 0.0319 | 0.01       | -0.0329     | 0.20 | 0.0771 |
| Pt···Pt | [2·SeDA] | 0.0508   | 0.1148           | -0.0504 | 0.0396 | 0.01       | -0.0386     | 0.20 | 0.0930 |
| NC···C  | [1·TeDA] | 0.0048   | 0.0159           | -0.0021 | 0.003  | 0.89       | -0.0011     | 0.02 | 0.0054 |

|        |          |        |        |         |        |      |         |      |        |
|--------|----------|--------|--------|---------|--------|------|---------|------|--------|
| NC...C | [1·SeDA] | 0.0047 | 0.0155 | -0.0021 | 0.003  | 1.63 | -0.0009 | 0.02 | 0.0052 |
| NC...C | [2·SeDA] | 0.0049 | 0.0164 | -0.0022 | 0.0031 | 0.61 | -0.0013 | 0.02 | 0.0055 |
| NC...C | [3·SeDA] | 0.0034 | 0.012  | -0.0015 | 0.0022 | 0.37 | -0.0011 | 0.01 | 0.0066 |
| C...C  | [1·TeDA] | 0.0078 | 0.0248 | -0.0039 | 0.0051 | 0.28 | -0.0025 | 0.03 | 0.0092 |
| C...C  | [1·SeDA] | 0.0078 | 0.0248 | -0.0039 | 0.005  | 0.04 | -0.0028 | 0.03 | 0.0089 |
| C...C  | [2·SeDA] | 0.0080 | 0.0257 | -0.0041 | 0.0053 | 0.44 | -0.0024 | 0.03 | 0.0095 |
| C...S  | [3·SeDA] | 0.0108 | 0.0296 | -0.0052 | 0.0063 | 0.46 | -0.0041 | 0.05 | 0.0144 |

### 2.3. ETS-NOCV/CDF

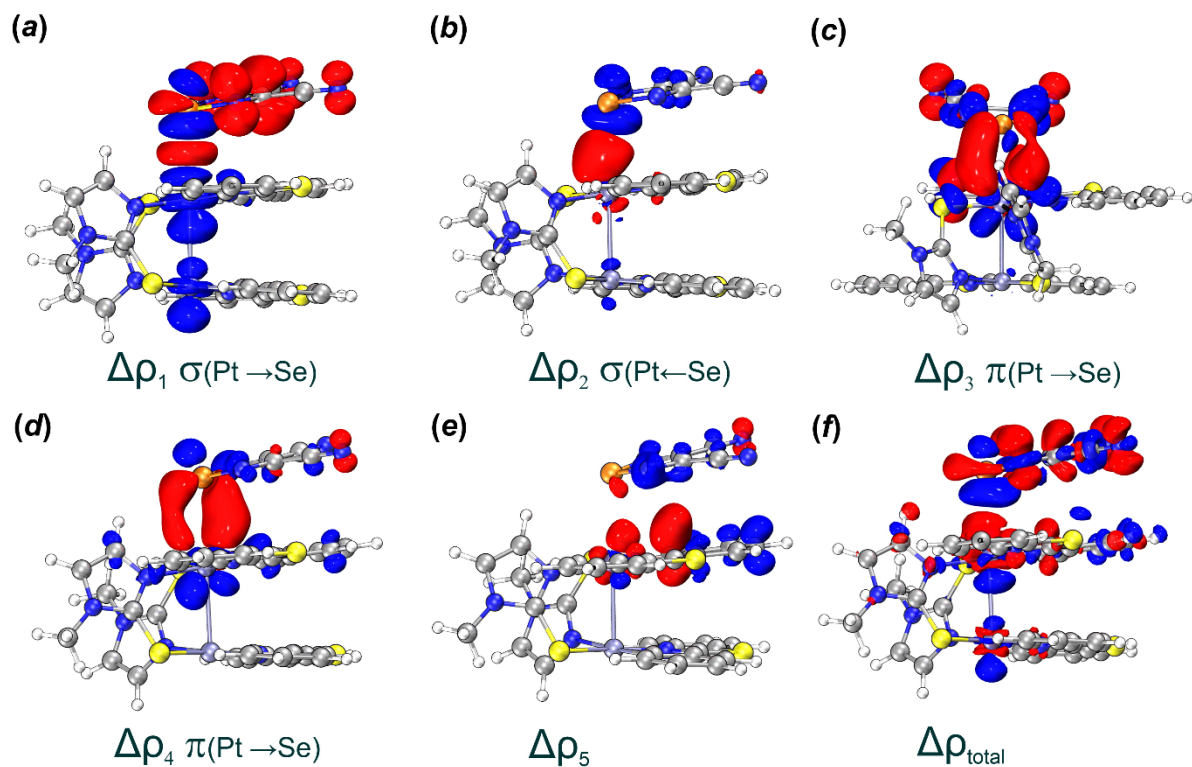

**Figure S10.** ETS–NOCV deformation densities for [1·SeDA]. Electron transfer occurs from regions of the electron density depletion (blue) to those of the electron density concentration (red) (isovalues 0.0005 (*a*, *d*, *e*), 0.001 (*b*), 0.0002 (*c*) and 0.002 (*f*) a.u.).



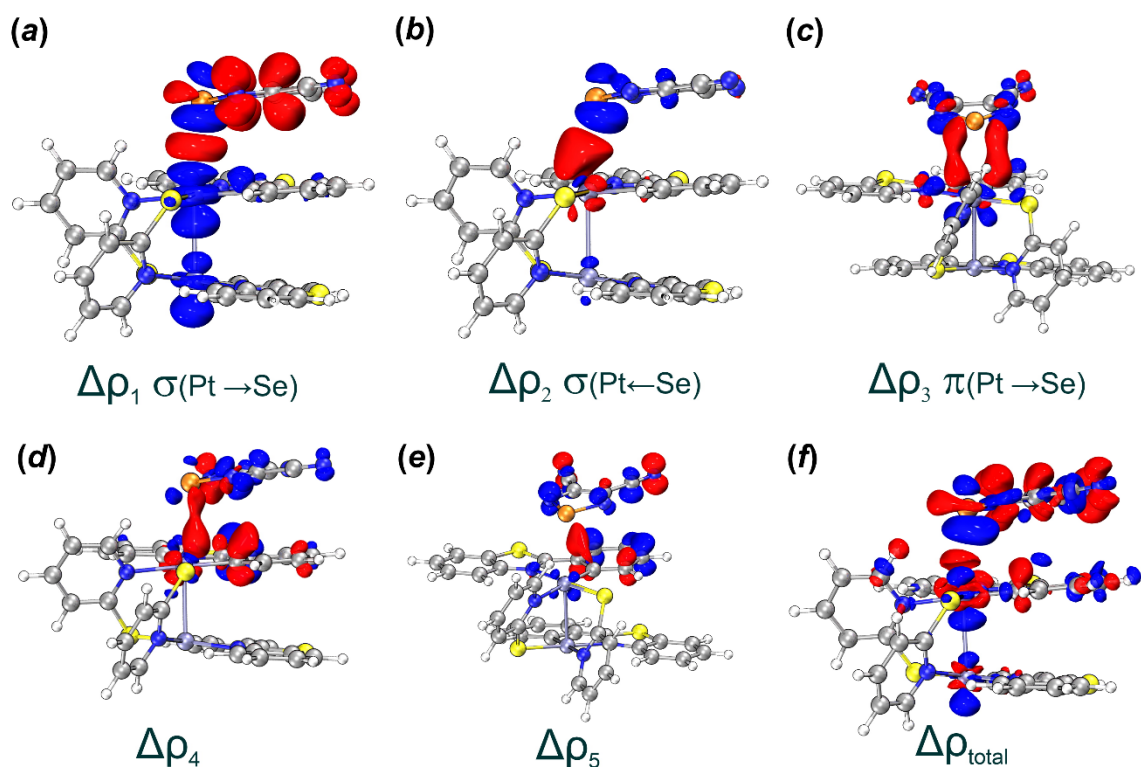

**Figure S11.** ETS–NOCV deformation densities for [2·SeDA]. Electron transfer occurs from regions of the electron density depletion (blue) to those of the electron density concentration (red) (isovalues 0.0005 (*a*, *d*, *e*), 0.001 (*b*), 0.0002 (*c*) and 0.002 (*f*) a.u.).

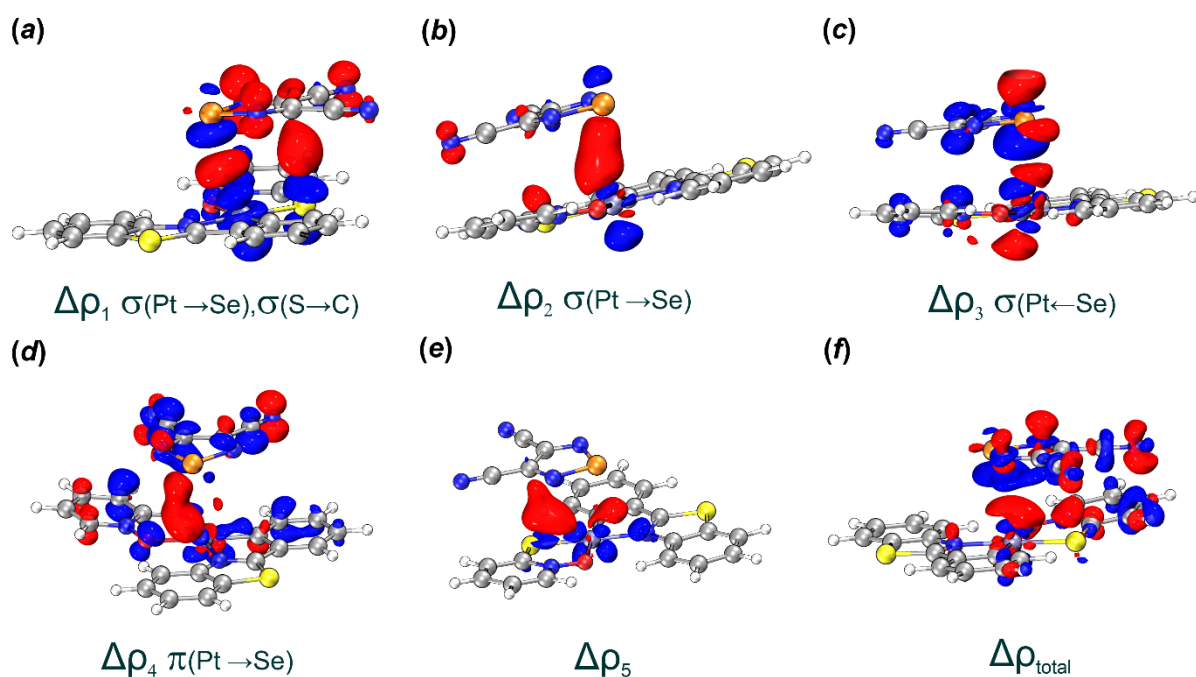

**Figure S12.** ETS–NOCV deformation densities for [3·SeDA]. Electron transfer occurs from regions of the electron density depletion (blue) to those of the electron density concentration (red) (isovalues 0.0005 (*a*, *d*, *e*), 0.001 (*b*), 0.0002 (*c*) and 0.002 (*f*) a.u.).



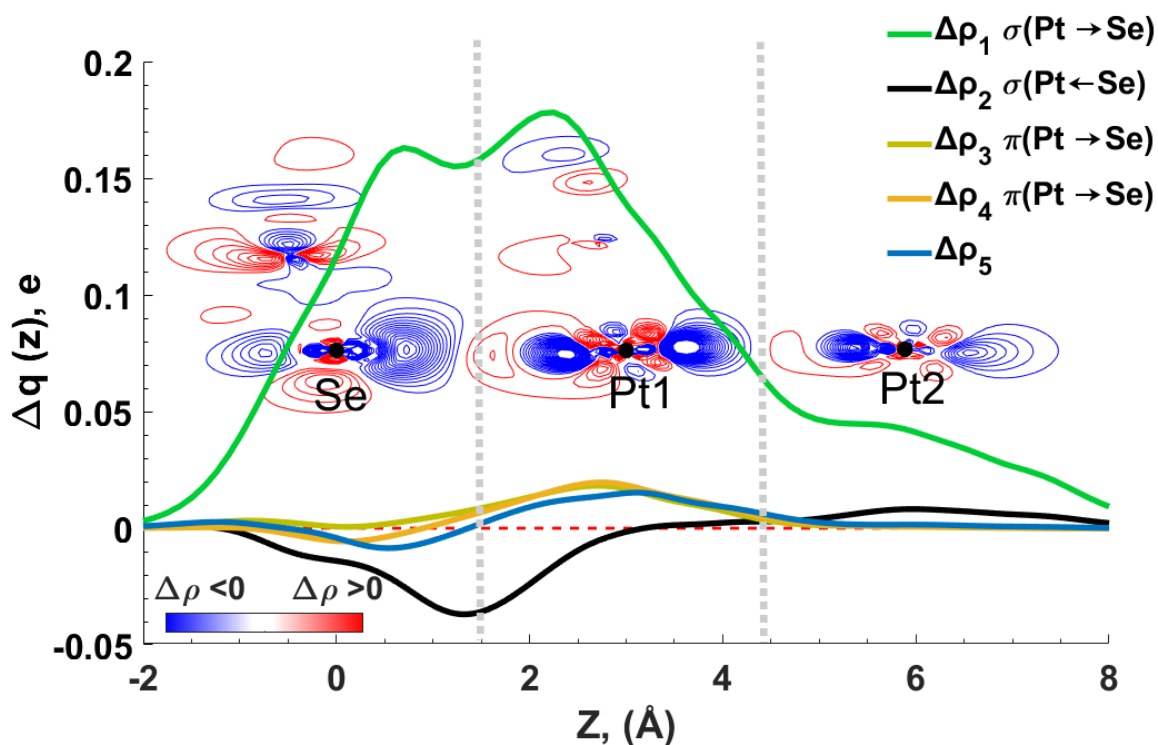

**Figure S13.** EDD contour plot (red – charge concentration, blue – charge depletion, range – 0.01 to 0.01 a.u., step 0.0005 a.u.) and CDF functions for the Se···Pt interaction in [1·SeDA] (black dots indicate positions of the atomic nuclei, grey vertical lines identify the boundaries between the Se, Pt2 and Pt1 atoms, which are placed along the z axis).

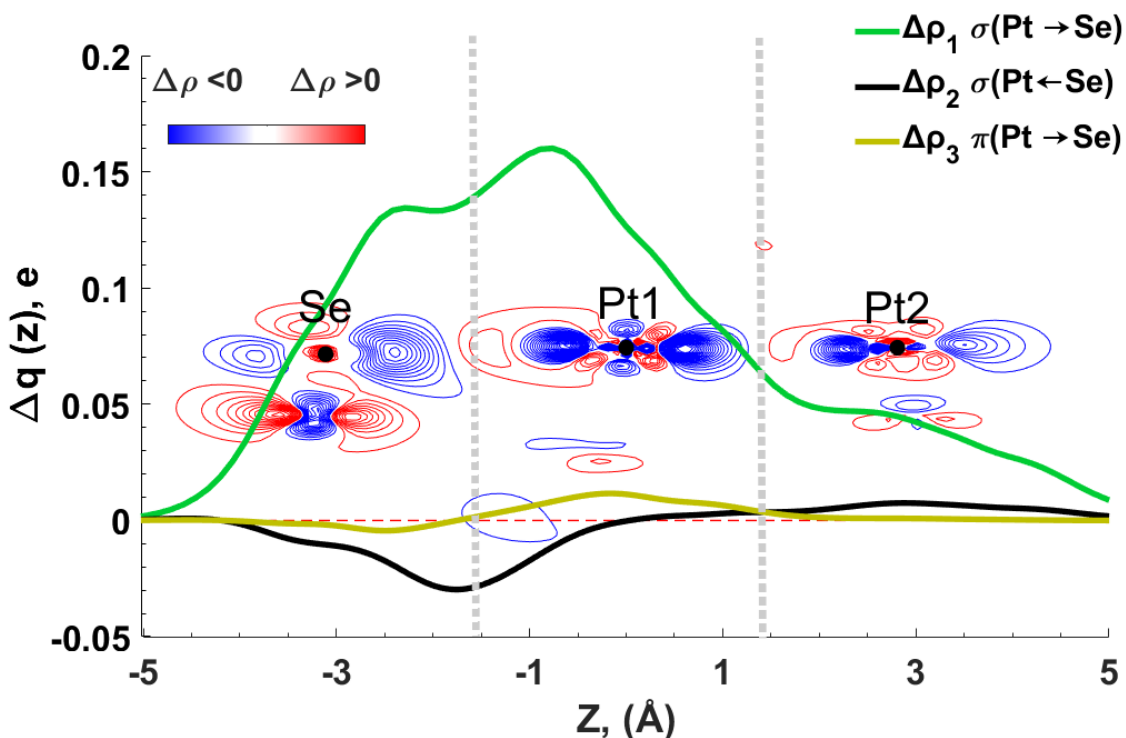

**Figure S14.** EDD contour plot (red – charge concentration, blue – charge depletion, range – 0.01 to 0.01 a.u., step 0.0005 a.u.) and CDF functions for the Se···Pt interaction in [2·SeDA] (black dots indicate positions of the atomic nuclei, grey vertical lines identify the boundaries between the Se, Pt2 and Pt1 atoms, which are placed along the z axis).

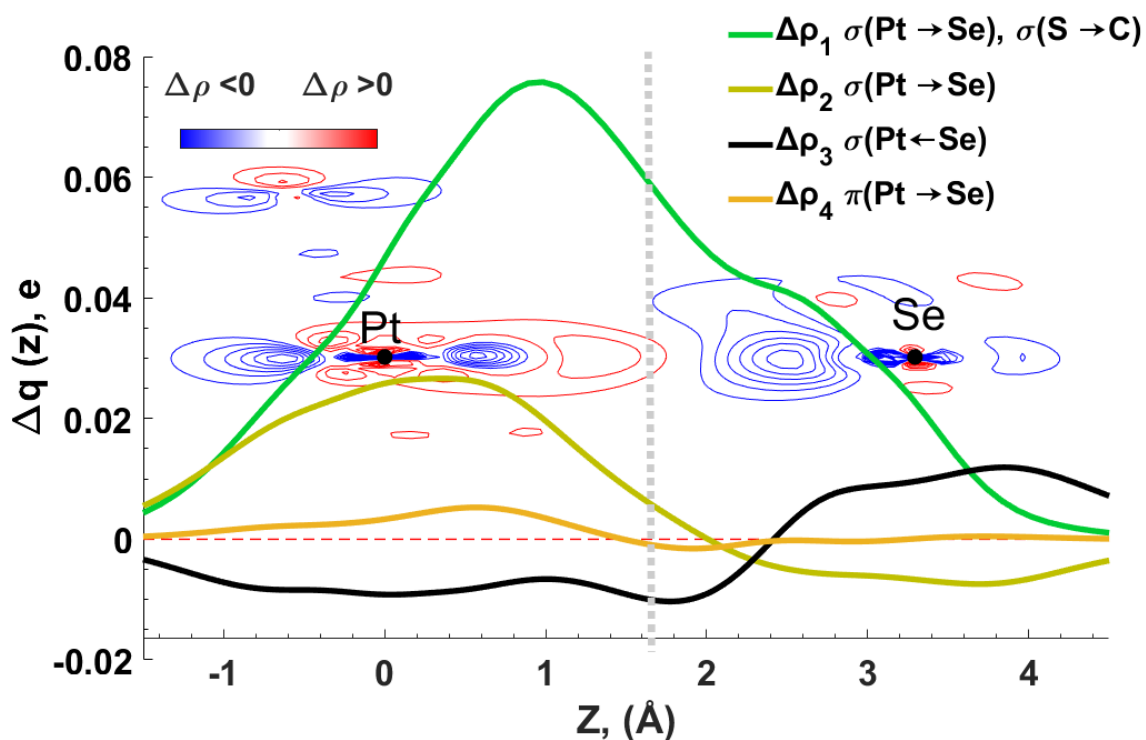

**Figure S15.** EDD contour plot (red – charge concentration, blue – charge depletion, range – 0.01 to 0.01 a.u., step 0.0005 a.u.) and CDF functions for the Se $\cdots$ Pt interaction in [3·SeDA] (black dots indicate positions of the atomic nuclei, grey vertical lines identify the boundaries between the Se and Pt1 atoms, which are placed along the z axis).

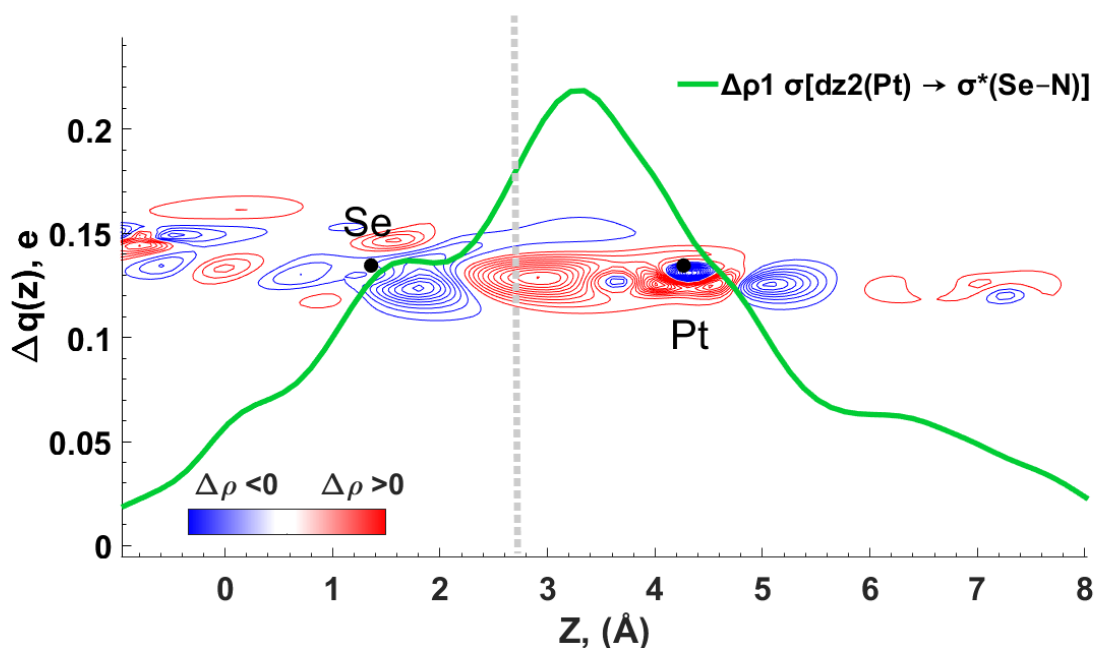

**Figure S16.** EDD contour plot (red – charge concentration, blue – charge depletion, range – 0.01 to 0.01 a.u., step 0.0005 a.u.) and CDF functions for the Se $\cdots$ Pt interaction in [1·SeDA] $\sigma$  (black dots indicate positions of the atomic nuclei, grey vertical lines identify the boundaries between the Se and Pt1 atoms, which are placed along the z axis).

### 3. Cartesian coordinates for the studied molecules

#### Optimized geometries

*Cartesian coordinate for 1 (in Å)*

|    |                   |                   |                   |
|----|-------------------|-------------------|-------------------|
| Pt | 8.98115936952892  | 10.22477292723849 | 5.37399906226541  |
| Pt | 6.03631320474285  | 10.28225766274412 | 5.40631057592790  |
| S  | 6.10089353839408  | 9.90194107074395  | 7.67510267126854  |
| S  | 9.18390831991478  | 14.66143418445319 | 6.00691628871118  |
| S  | 8.88735500844339  | 8.23176001505016  | 4.22671559744231  |
| S  | 5.90188556016938  | 12.61448176023159 | 1.57558870743911  |
| N  | 5.87810111497743  | 10.80433495722188 | 3.40906692649215  |
| N  | 9.16486083165124  | 12.09567122800622 | 6.24130702285079  |
| N  | 7.18422595587562  | 6.21104308795936  | 4.87193769442972  |
| N  | 6.28930148065299  | 8.19208439959585  | 5.17713035549511  |
| N  | 8.68652871554546  | 9.08122801635977  | 7.13171686357915  |
| N  | 7.74735948516609  | 8.07880789155306  | 8.84383567957018  |
| C  | 5.84958233527972  | 12.25404998486364 | 5.60802015231947  |
| C  | 5.80770042033314  | 12.97138298914796 | 4.38227857989104  |
| C  | 5.81237860920049  | 13.02949728577265 | 6.77769591549643  |
| H  | 5.87411943085939  | 12.53780206941709 | 7.74743557431187  |
| C  | 9.20225774918494  | 11.31753977268652 | 3.72444519808193  |
| C  | 9.26552374005539  | 12.71892647649809 | 3.94986100286966  |
| C  | 5.71537318838808  | 14.41912496791302 | 6.72358758232792  |
| H  | 5.68508043999389  | 14.98543658017293 | 7.65461296820059  |
| C  | 9.12077318880867  | 12.57386611833686 | 7.53629841299858  |
| C  | 5.91800589309177  | 10.10683470180071 | 2.21771177106986  |
| C  | 5.85845623347181  | 12.11351924034602 | 3.22964767542884  |
| C  | 9.10886818515616  | 13.98452458248568 | 7.60615549215159  |
| C  | 9.04039599528748  | 14.66170011478498 | 8.82281933025237  |
| H  | 9.02263462122406  | 15.74935655185939 | 8.85565950387718  |
| C  | 9.10469549534549  | 11.83186874081181 | 8.72278130799985  |
| H  | 9.15289266848115  | 10.75042248101522 | 8.67699223890803  |
| C  | 7.40119655603938  | 7.55472196848491  | 4.79772313226594  |
| C  | 5.72560982160316  | 14.36909113355512 | 4.32149392036170  |
| H  | 5.70432586391409  | 14.87665295849427 | 3.35627954324013  |
| C  | 9.02642233675994  | 7.57321806638935  | 8.73673545791989  |
| H  | 9.41040058910902  | 6.82903987840743  | 9.42306907731754  |
| C  | 9.03893145918057  | 12.50569878671195 | 9.93420268378732  |
| H  | 9.02126412811596  | 11.93267114421576 | 10.85954939154023 |
| C  | 5.89471447399998  | 6.00326670986060  | 5.31593536953951  |
| H  | 5.48514322212805  | 5.00994662401105  | 5.44954828987271  |
| C  | 9.24291425009704  | 10.90645299910517 | 2.38277775380381  |
| H  | 9.16539936663815  | 9.84636761524715  | 2.14583318770324  |
| C  | 5.91204086968519  | 8.71899308186221  | 2.03794783110677  |
| H  | 5.84822633566053  | 8.06901204929071  | 2.90241783813732  |
| C  | 9.20820551755536  | 13.06505856460339 | 5.34412813352122  |
| C  | 5.95110007219382  | 10.94800812893074 | 1.08357155841019  |
| C  | 9.59065735390111  | 8.19437052355589  | 7.65890786249529  |
| H  | 10.57425661758985 | 8.06991119204089  | 7.22359189152240  |
| C  | 6.03896394716827  | 9.05566796778956  | -0.36872453436285 |
| H  | 6.09426740840628  | 8.62961843977289  | -1.36887792793021 |
| C  | 5.35815447175885  | 7.24336890927663  | 5.51609175261699  |
| H  | 4.37695772794026  | 7.52395714470296  | 5.87801987621555  |
| C  | 5.67068834890011  | 15.09848075397798 | 5.50023335424175  |
| H  | 5.60354516723760  | 16.18455921241033 | 5.47359566478984  |
| C  | 5.97656996027622  | 8.20949643431932  | 0.74872249873317  |
| H  | 5.97703640912902  | 7.13057551009283  | 0.60430501025481  |
| C  | 8.15435329799706  | 5.19606817999937  | 4.54984761235296  |
| H  | 8.10925961617522  | 4.91827131251217  | 3.48954791922610  |
| H  | 7.97281455403305  | 4.30864426156451  | 5.16309375862398  |
| H  | 9.15340309603251  | 5.59136783708323  | 4.76176851253878  |
| C  | 6.01835811940940  | 10.43653865960825 | -0.21157175856359 |
| H  | 6.05240645156474  | 11.10111011995153 | -1.07271319882446 |
| C  | 9.37108902259402  | 13.65255689246163 | 2.91006432641967  |
| H  | 9.40809116174711  | 14.71988723775107 | 3.13173287586494  |
| C  | 8.99713264474829  | 13.90707428544073 | 9.98921901423282  |
| H  | 8.94028776786108  | 14.41027937220797 | 10.95278080143345 |
| C  | 7.56385902001240  | 8.99542886978776  | 7.85183717733555  |
| C  | 9.36263718395432  | 11.82956513993255 | 1.34501342247095  |
| H  | 9.39449136491313  | 11.47019018914079 | 0.31629826663776  |
| C  | 6.75691200594815  | 7.70659088671575  | 9.82138882815044  |
| H  | 6.90974455936194  | 6.66514090752825  | 10.11899257602537 |
| H  | 5.76528118932885  | 7.81848094096971  | 9.37039350638136  |
| H  | 6.80780355502223  | 8.34770026388880  | 10.71010473918233 |

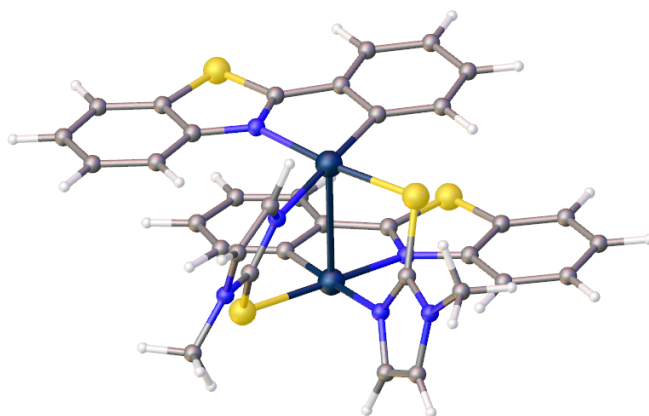

|   |                  |                   |                  |
|---|------------------|-------------------|------------------|
| C | 9.42818035479032 | 13.20496654806639 | 1.59827252106388 |
| H | 9.51294198029420 | 13.91440243920976 | 0.77711733068650 |

*Cartesian coordinate for 2 (in Å)*

|    |                   |                   |                   |
|----|-------------------|-------------------|-------------------|
| Pt | 2.14681929988971  | 5.19963126229465  | 11.56677900474681 |
| S  | 4.89587751985478  | 6.44921034458565  | 9.68698242579281  |
| S  | 4.40395978798268  | 1.50209191462885  | 12.75900162712820 |
| N  | 3.56372013287805  | 3.90877061266672  | 12.37814389545727 |
| N  | 3.22491177683261  | 7.04589281202999  | 11.74948337187799 |
| C  | 1.145719444074902 | 3.48828036978855  | 11.41013930186430 |
| C  | 5.52827763470767  | 5.23852625865407  | 13.15921960920502 |
| H  | 5.04477120115081  | 6.19409005631952  | 12.99964626879822 |
| C  | 2.80005461403522  | 7.85318787218460  | 12.73957832965724 |
| H  | 1.91799973291938  | 7.50280471641038  | 13.27217217381687 |
| C  | 1.88510576847566  | 2.33444864779483  | 11.77930678172980 |
| C  | 3.20052154003799  | 2.64241006337117  | 12.27002309378424 |
| C  | 5.47827010442598  | 2.81531174356420  | 13.13772132288318 |
| C  | 6.82291890548139  | 5.16815138979716  | 13.65344891383029 |
| H  | 7.35805044837764  | 6.09136182476729  | 13.86794319067538 |
| C  | 6.78000234854438  | 2.74373411808899  | 13.63216511931096 |
| H  | 7.25326198747813  | 1.78180621158035  | 13.81944522955715 |
| C  | 4.28198574598989  | 7.41488616992679  | 10.99172735177480 |
| C  | -0.15422173224622 | 3.26537494709635  | 10.92912891289295 |
| H  | -0.75968596203372 | 4.11164076593935  | 10.60887383832529 |
| C  | 3.43314247080792  | 9.03271742362016  | 13.08135671062410 |
| H  | 3.05350483607280  | 9.63793923963923  | 13.90021149455096 |
| C  | 4.97514681423289  | 8.60885201890447  | 11.29402178042009 |
| H  | 5.82438488994821  | 8.88064564426033  | 10.67150575506535 |
| C  | 0.07589871027631  | 0.85617106267331  | 11.19933865819378 |
| H  | -0.34330613583381 | -0.14422465693609 | 11.10925139382223 |
| C  | 4.84379144088259  | 4.05057038466603  | 12.87802957405377 |
| C  | 1.36846097306949  | 1.03609923673861  | 11.66883606189181 |
| H  | 1.97848891314853  | 0.17719001691006  | 11.95079937626102 |
| C  | -0.67910214384634 | 1.97789109969746  | 10.83521540755005 |
| H  | -1.69341760200806 | 1.84459173460314  | 10.45884399582605 |
| C  | 7.45124891193846  | 3.93477378270529  | 13.88171782327956 |
| H  | 8.46929140505388  | 3.90782497201010  | 14.26588656707767 |
| C  | 4.56200079801976  | 9.40789211235794  | 12.34072897115387 |
| H  | 5.09768787805914  | 10.32787765257193 | 12.57126402480931 |
| Pt | 3.14791204365229  | 5.19526405130659  | 8.90764117025490  |
| S  | 0.40145174396551  | 6.45516766766847  | 10.78452349002161 |
| S  | 0.88266625958176  | 1.49954247502306  | 7.72509022205672  |
| N  | 1.72818389123422  | 3.90536001776246  | 8.09964385469669  |
| N  | 2.07334473115111  | 7.04336050105545  | 8.72023062364429  |
| C  | 4.14533957129749  | 3.48217287472034  | 9.06869528486522  |
| C  | -0.23351993306546 | 5.23736715306975  | 7.31520335047397  |
| H  | 0.25211938851481  | 6.19229373619598  | 7.47206094713201  |
| C  | 2.49946738850752  | 7.84730284727774  | 7.72792974709356  |
| H  | 3.38102232710978  | 7.49405415155618  | 7.19640504732266  |
| C  | 3.40345258218605  | 2.32898346106678  | 8.70250534137291  |
| C  | 2.08870362758288  | 2.63849563560093  | 8.21090851463120  |
| C  | -0.18884384189740 | 2.81411714104983  | 7.34311387321491  |
| C  | -1.52836247587260 | 5.16853976126695  | 6.82129884360355  |
| H  | -2.06145667132337 | 6.09236638125710  | 6.60440040975478  |
| C  | -1.49074515622094 | 2.74410462798548  | 6.84888690233112  |
| H  | -1.96610446537548 | 1.78272912688563  | 6.66410939764269  |
| C  | 1.01689285457307  | 7.41608905725297  | 9.47704505971315  |
| C  | 5.44461212484651  | 3.25769972773478  | 9.55077181521389  |
| H  | 6.05182450480787  | 4.10347952823442  | 9.86898844530032  |
| C  | 1.86817323584085  | 9.02683754794791  | 7.38290044485694  |
| H  | 2.24870919097023  | 9.62924843581101  | 6.56239247557281  |
| C  | 0.32558650658708  | 8.61031649928204  | 9.17149124445105  |
| H  | -0.52320985711029 | 8.88515584153129  | 9.79327061466009  |
| C  | 5.20923296194722  | 0.84829387318897  | 9.28699032930779  |
| H  | 5.62619272708087  | -0.15277671199669 | 9.37996057920124  |
| C  | 0.44835451018576  | 4.04865532588008  | 7.59955456886489  |
| C  | 3.91724132976878  | 1.02980130317262  | 8.81652586853559  |
| H  | 3.30538654237388  | 0.17148516228592  | 8.53672518628966  |
| C  | 5.96657185657531  | 1.96930802727380  | 9.64842986994157  |
| H  | 6.98040080505075  | 1.83475097412470  | 10.02567750109089 |
| C  | -2.15942110648400 | 3.93595861524568  | 6.59632102928665  |
| H  | -3.17755237969324 | 3.91023478985332  | 6.21230534423695  |
| C  | 0.73987491112850  | 9.40576115058100  | 8.12251112685423  |
| H  | 0.20557381516965  | 10.32590141593574 | 7.88939011882040  |

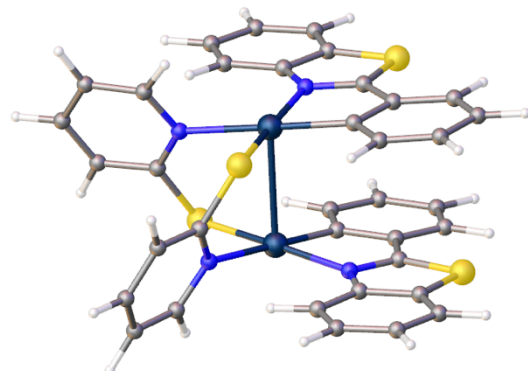

### Cartesian coordinate for **3** (in Å)

|    |                   |                   |                  |
|----|-------------------|-------------------|------------------|
| Pt | 2.17025712036107  | 5.42388330010266  | 5.44622044765857 |
| S  | 1.70795197560401  | 3.48788313684309  | 6.49951368036642 |
| S  | 4.30489254294749  | 9.12412103400521  | 4.08234069173766 |
| O  | 0.26389428877037  | 5.17602746871481  | 4.62170913789370 |
| N  | -0.40024997269498 | 4.10412065972007  | 4.98442120666884 |
| N  | 2.66853175423062  | 7.18429443767397  | 4.52480192500705 |
| C  | 4.64123927237775  | 6.86613863473848  | 5.78599116160712 |
| C  | -1.63529258319139 | 3.93228873689767  | 4.45150828025939 |
| H  | -1.93331070892881 | 4.72410795664884  | 3.77115211637848 |
| C  | 2.28089706742761  | 10.07250098290463 | 2.34643273628869 |
| H  | 2.87033306641273  | 10.94420664228974 | 2.06901315216159 |
| C  | 3.96453005762367  | 5.68810067847160  | 6.21079683433498 |
| C  | -1.89492635696483 | 1.88932084982454  | 5.66712074983844 |
| H  | -2.47989769144203 | 1.01345067115630  | 5.93944578081943 |
| C  | -0.63809215129911 | 2.07905808044324  | 6.2008823440394  |
| H  | -0.20314345785286 | 1.36800264623622  | 6.89942677108067 |
| C  | 4.65656597864069  | 4.86955498643515  | 7.11776766417636 |
| H  | 4.19688785210433  | 3.95153432995066  | 7.48205076912787 |
| C  | 1.01673573004478  | 9.86059654975315  | 1.80746633875233 |
| H  | 0.61140385057179  | 10.57876612099044 | 1.09700888858793 |
| C  | 3.86482700770548  | 7.63753641838701  | 4.85647488410149 |
| C  | 0.13757704490065  | 3.20590341426380  | 5.86226597370916 |
| C  | 0.26102429907314  | 8.73382967020162  | 2.16753382413439 |
| H  | -0.72552937527625 | 8.59195050039191  | 1.72959384153097 |
| C  | 0.74547245768095  | 7.79670482895124  | 3.07033046312332 |
| H  | 0.17533272298376  | 6.91795327229699  | 3.36270873589968 |
| C  | 2.77104080829966  | 9.13318185447242  | 3.25255348602427 |
| C  | -2.40678824335937 | 2.84088977464530  | 4.76913207255572 |
| H  | -3.39114757275094 | 2.73777831056560  | 4.32100710584545 |
| C  | 2.01687269447520  | 7.99819797410356  | 3.61991846815631 |
| C  | 5.93068196579248  | 5.20598388686265  | 7.56907094496305 |
| H  | 6.43749206762904  | 4.54652519199038  | 8.27337720055535 |
| C  | 5.92308397065201  | 7.20814900216034  | 6.23857137001714 |
| H  | 6.40392093336989  | 8.12170238883331  | 5.88670544929546 |
| C  | 6.57205823538907  | 6.37381050066937  | 7.13609052887794 |
| H  | 7.56737334869225  | 6.62244510740382  | 7.49928908406072 |

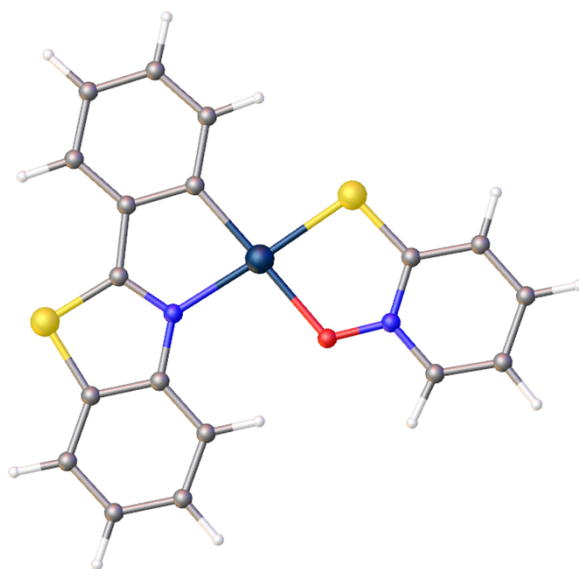

### Cartesian coordinate for **SeDA** (in Å)

|    |                   |                   |                    |
|----|-------------------|-------------------|--------------------|
| C  | -4.04351316848341 | -1.44071744283260 | -18.70901409304277 |
| C  | -3.26314427647961 | -0.60314190237007 | -17.82439396773952 |
| C  | -4.08813233290198 | -2.86292943936305 | -18.59673422172011 |
| C  | -2.46779357113749 | -1.12367133769676 | -16.75962293396816 |
| N  | -4.72177855443991 | -0.82544525212958 | -19.63742828906329 |
| N  | -3.31857247504280 | 0.68063620968670  | -18.04677751866981 |
| N  | -4.10527804949522 | -4.00687738031934 | -18.48248976921670 |
| N  | -1.83541826084158 | -1.57108273736120 | -15.90998666426330 |
| Se | -4.40355831117798 | 0.91924228238592  | -19.44274054231619 |

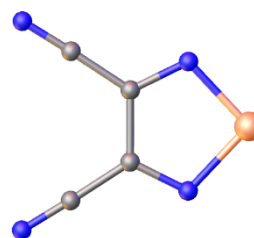

### Cartesian coordinate for **TeDA** (in Å)

|    |                   |                   |                    |
|----|-------------------|-------------------|--------------------|
| C  | -4.04904230028160 | -1.44123717808878 | -18.71671060774761 |
| C  | -3.26094775962535 | -0.59400256927070 | -17.82141340956593 |
| C  | -4.06361943472294 | -2.86544946930511 | -18.56501101727771 |
| C  | -2.47629413093078 | -1.16205789683470 | -16.76630487618908 |
| N  | -4.74461042650576 | -0.88848676179223 | -19.66157703985354 |
| N  | -3.27577306541549 | 0.69177152539508  | -17.99102300877943 |
| N  | -4.06250144699181 | -4.00718419665821 | -18.42679807511767 |
| N  | -1.85238559315225 | -1.63796289452315 | -15.92552176409678 |
| Te | -4.46201484237400 | 1.07062244107781  | -19.53482820137200 |

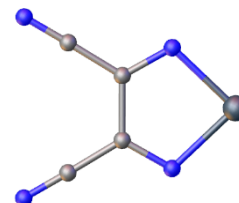

### Cartesian coordinate for **[1-TeDA]** (in Å)

|    |             |            |            |
|----|-------------|------------|------------|
| Pt | 0.00000000  | 0.00000000 | 2.89640900 |
| Pt | 0.00000000  | 0.00000000 | 0.00000000 |
| S  | -2.30023400 | 0.23360400 | 0.07314200 |
| S  | 0.41703900  | 4.46114400 | 3.14875800 |

|    |              |              |              |
|----|--------------|--------------|--------------|
| S  | 0.675990000  | -2.211664000 | 2.827328000  |
| S  | 4.293467000  | 1.277287000  | -0.276358000 |
| N  | 2.067283000  | 0.000017000  | -0.129046000 |
| N  | -0.403176000 | 2.028301000  | 3.016096000  |
| N  | -0.524267000 | -4.050950000 | 1.220504000  |
| N  | -0.334978000 | -2.082681000 | 0.263073000  |
| N  | -1.977749000 | -0.733624000 | 2.637193000  |
| N  | -3.870124000 | -1.304338000 | 1.678388000  |
| C  | 0.313993000  | 1.971733000  | -0.143089000 |
| C  | 1.679468000  | 2.344122000  | -0.197457000 |
| C  | -0.626397000 | 3.007259000  | -0.205550000 |
| H  | -1.689250000 | 2.778592000  | -0.162942000 |
| C  | 1.872882000  | 0.692721000  | 3.031896000  |
| C  | 1.971921000  | 2.104779000  | 3.079958000  |
| C  | -0.221407000 | 4.335552000  | -0.330825000 |
| H  | -0.976655000 | 5.117073000  | -0.401874000 |
| C  | -1.555615000 | 2.784762000  | 3.066406000  |
| C  | 3.033064000  | -0.983447000 | -0.181487000 |
| C  | 2.576083000  | 1.219854000  | -0.178388000 |
| C  | -1.295686000 | 4.171945000  | 3.122846000  |
| C  | -2.324913000 | 5.111717000  | 3.160518000  |
| H  | -2.106206000 | 6.177001000  | 3.197456000  |
| C  | -2.880601000 | 2.334444000  | 3.089524000  |
| H  | -3.088461000 | 1.271149000  | 3.081583000  |
| C  | -0.095769000 | -2.769263000 | 1.384770000  |
| C  | 2.091272000  | 3.679791000  | -0.311062000 |
| H  | 3.150912000  | 3.925919000  | -0.374230000 |
| C  | -3.883181000 | -1.850950000 | 2.942893000  |
| H  | -4.719815000 | -2.430366000 | 3.312535000  |
| C  | -3.904260000 | 3.270380000  | 3.133220000  |
| H  | -4.937259000 | 2.927654000  | 3.149256000  |
| C  | -1.057975000 | -4.169760000 | -0.044049000 |
| H  | -1.462887000 | -5.103223000 | -0.414182000 |
| C  | 3.072028000  | -0.027510000 | 3.092819000  |
| H  | 3.054686000  | -1.114699000 | 3.054479000  |
| C  | 2.848632000  | -2.370764000 | -0.198952000 |
| H  | 1.846111000  | -2.781329000 | -0.182432000 |
| C  | 0.694391000  | 2.764982000  | 3.059372000  |
| C  | 4.342927000  | -0.459055000 | -0.247202000 |
| C  | -2.694967000 | -1.502687000 | 3.519201000  |
| H  | -2.310589000 | -1.764047000 | 4.496860000  |
| C  | 5.263190000  | -2.661018000 | -0.282918000 |
| H  | 6.121617000  | -3.329169000 | -0.315253000 |
| C  | -0.949132000 | -2.935885000 | -0.619318000 |
| H  | -1.280917000 | -2.609003000 | -1.596528000 |
| C  | 1.133752000  | 4.679688000  | -0.384290000 |
| H  | 1.432969000  | 5.718758000  | -0.501280000 |
| C  | 3.965322000  | -3.193245000 | -0.247364000 |
| H  | 3.829595000  | -4.273176000 | -0.258946000 |
| C  | -0.432605000 | -5.093069000 | 2.213642000  |
| H  | 0.519202000  | -5.632254000 | 2.139832000  |
| H  | -1.258601000 | -5.797125000 | 2.080792000  |
| H  | -0.496764000 | -4.635230000 | 3.205922000  |
| C  | 5.464470000  | -1.286267000 | -0.289599000 |
| H  | 6.466758000  | -0.864922000 | -0.332986000 |
| C  | 3.201919000  | 2.769652000  | 3.187048000  |
| H  | 3.236725000  | 3.857182000  | 3.245926000  |
| C  | -3.634304000 | 4.647170000  | 3.158534000  |
| H  | -4.456530000 | 5.359539000  | 3.187546000  |
| C  | -2.697075000 | -0.633150000 | 1.515054000  |
| C  | 4.296220000  | 0.629301000  | 3.211156000  |
| H  | 5.210344000  | 0.041370000  | 3.281554000  |
| C  | -4.910038000 | -1.417008000 | 0.685090000  |
| H  | -5.440120000 | -2.364103000 | 0.817842000  |
| H  | -4.448430000 | -1.390714000 | -0.307152000 |
| H  | -5.623922000 | -0.588151000 | 0.758890000  |
| C  | 4.369569000  | 2.025752000  | 3.259345000  |
| H  | 5.330737000  | 2.522168000  | 3.371628000  |
| Te | 0.055437000  | -0.057228000 | -2.994379000 |
| N  | -0.724765000 | 1.696397000  | -3.386440000 |
| N  | 1.826034000  | 0.758650000  | -3.188258000 |
| N  | -0.212666000 | 5.061879000  | -3.898178000 |
| C  | 0.275889000  | 2.547843000  | -3.490790000 |
| N  | 3.692764000  | 3.618329000  | -3.505989000 |
| C  | 1.632686000  | 2.048446000  | -3.383992000 |
| C  | 2.769066000  | 2.918645000  | -3.467715000 |
| C  | 0.003317000  | 3.937415000  | -3.717528000 |

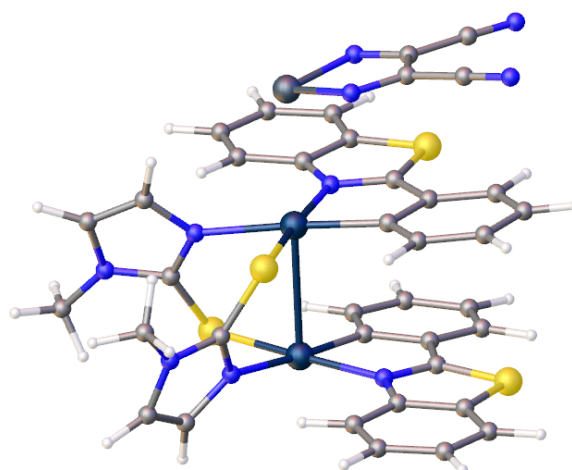



Cartesian coordinate for [1·SeDA] (in Å)

|    |             |             |             |
|----|-------------|-------------|-------------|
| Pt | 0.00000000  | 0.00000000  | 0.00000000  |
| Pt | -0.03529900 | 0.09048400  | -2.90998900 |
| S  | 0.92437400  | -2.11367100 | -0.10505600 |
| S  | 1.59941000  | 1.70764700  | -2.82380600 |
| S  | -3.20175700 | 3.12829000  | 0.37858900  |
| S  | -4.16569400 | -1.64506100 | -3.10312300 |
| N  | -1.62564200 | -1.21861100 | -3.10930700 |
| N  | -1.00264000 | 1.80741100  | 0.18723800  |
| N  | 1.97436800  | 0.73313300  | -0.26445000 |
| N  | 1.52309000  | -1.32735100 | -2.68604100 |
| C  | -1.51704000 | 1.41433900  | -3.06207000 |
| N  | 3.78220800  | 1.54486800  | -1.20970100 |
| C  | -2.31399400 | 1.65613300  | 0.24973000  |
| C  | -0.61597000 | 3.13019000  | 0.24576300  |
| C  | -2.81398600 | 0.84026400  | -3.12297000 |
| C  | -1.87199000 | -0.68583500 | 0.15871300  |
| N  | 2.92890400  | -2.77530000 | -1.82244200 |
| C  | 2.45497900  | 1.28914600  | -1.38165800 |
| C  | -2.79274300 | -0.59754200 | -3.11681100 |
| C  | -2.86119200 | 0.32558500  | 0.25315100  |
| C  | -1.75659900 | -2.59386500 | -3.10403700 |
| C  | 0.68514100  | 3.64560500  | 0.24176900  |
| H  | 1.53035700  | 2.96901100  | 0.20256900  |
| C  | 3.01548200  | 0.61213000  | 0.62116700  |
| H  | 2.88569700  | 0.15775600  | 1.59518700  |
| C  | -1.46005700 | 2.81601500  | -3.04610600 |
| H  | -0.49409400 | 3.31278200  | -2.97031200 |
| C  | -3.98354600 | 1.61078600  | -3.16792000 |
| H  | -4.96005300 | 1.12636500  | -3.20157400 |
| C  | 2.48360500  | -1.60534400 | -3.62529500 |
| H  | 2.47321200  | -1.13023900 | -4.59825700 |
| C  | -4.22662500 | 0.03543700  | 0.38454800  |
| H  | -4.95399200 | 0.84173500  | 0.47842200  |
| C  | 1.80999500  | -2.03451300 | -1.58994800 |
| C  | -0.73765000 | -3.55294900 | -3.13274300 |
| H  | 0.29614400  | -3.23455300 | -3.19220700 |
| C  | -2.32478200 | -2.01135900 | 0.19043000  |
| H  | -1.60860000 | -2.82695000 | 0.11036800  |
| C  | 0.86043200  | 5.02098600  | 0.29812200  |
| H  | 1.86995800  | 5.42807300  | 0.29279100  |
| C  | -3.10282500 | -3.02046000 | -3.08222300 |
| C  | -3.44804000 | -4.37063700 | -3.04493800 |
| H  | -4.49116700 | -4.67940700 | -3.01741200 |
| C  | 3.35794100  | -2.51881600 | -3.10796300 |
| H  | 4.23207500  | -2.99906900 | -3.52931400 |
| C  | -1.71026200 | 4.01833400  | 0.33883800  |
| C  | -3.68056900 | -2.30500100 | 0.33252100  |
| H  | -3.99662100 | -3.34649200 | 0.37794900  |
| C  | -4.63697300 | -1.28856400 | 0.43269500  |
| H  | -5.68939900 | -1.53298700 | 0.55913700  |
| C  | -1.08097600 | -4.89705900 | -3.09823500 |
| H  | -0.29197400 | -5.64675700 | -3.11549300 |
| C  | -2.42159900 | -5.30746400 | -3.04427500 |
| H  | -2.66280200 | -6.36827000 | -3.01090700 |
| C  | -2.61968800 | 3.58814000  | -3.10341300 |
| H  | -2.53529300 | 4.67475700  | -3.08817500 |
| C  | 4.14490000  | 1.12894300  | 0.05369100  |
| H  | 5.15610000  | 1.23240800  | 0.42653100  |
| C  | -3.88592600 | 2.99463400  | -3.16369300 |
| H  | -4.78295300 | 3.60992800  | -3.19839700 |
| C  | -0.23545500 | 5.89489500  | 0.36384300  |
| H  | -0.06938500 | 6.96982300  | 0.40391600  |
| C  | 3.54341600  | -3.67099000 | -0.87501300 |
| H  | 3.37286200  | -3.28297700 | 0.13453100  |
| H  | 4.61822600  | -3.72660600 | -1.06915300 |
| H  | 3.11193800  | -4.67743200 | -0.93687400 |
| C  | 4.64606300  | 2.13801900  | -2.19935500 |
| H  | 4.28819700  | 1.84695800  | -3.19250100 |
| H  | 5.66791200  | 1.77564500  | -2.05624800 |
| H  | 4.63755400  | 3.23282200  | -2.13449700 |
| C  | -1.53378900 | 5.40034400  | 0.39125000  |
| H  | -2.38928000 | 6.06956700  | 0.45819500  |
| Se | 0.00000000  | 0.00000000  | 2.98545100  |
| N  | -0.93080400 | -1.47212100 | 3.31032200  |
| N  | -1.38351600 | 1.08294000  | 3.21843900  |
| C  | -2.43909400 | 0.31504200  | 3.42639400  |

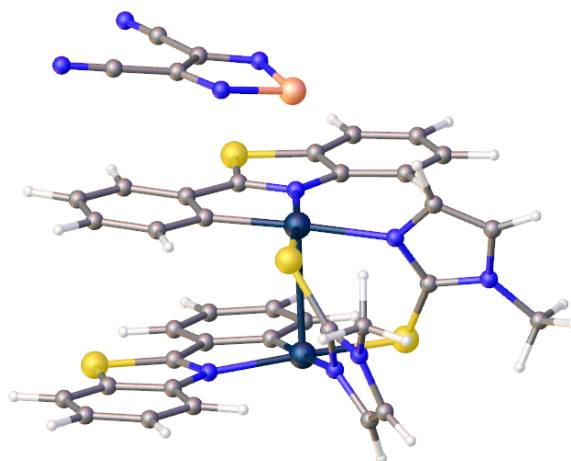

|   |              |              |             |
|---|--------------|--------------|-------------|
| N | -4.787365000 | 1.376572000  | 3.669147000 |
| C | -2.187939000 | -1.102478000 | 3.478792000 |
| C | -3.734539000 | 0.902126000  | 3.571027000 |
| N | -4.047232000 | -2.853924000 | 3.897814000 |
| C | -3.209039000 | -2.076585000 | 3.708496000 |

*Cartesian coordinate for [2-SeDA] (in Å)*

|    |              |              |              |
|----|--------------|--------------|--------------|
| Pt | 0.000000000  | 0.000000000  | 0.000000000  |
| S  | -0.005063000 | 2.286750000  | 2.598081000  |
| S  | -4.470383000 | 0.324998000  | -0.325859000 |
| N  | -1.932185000 | 0.737034000  | -0.227752000 |
| N  | 1.098387000  | 1.849482000  | 0.172389000  |
| C  | -0.993730000 | -1.728166000 | -0.112419000 |
| C  | -1.827802000 | 3.224977000  | -0.397460000 |
| H  | -0.745014000 | 3.259797000  | -0.396737000 |
| C  | 1.914991000  | 2.171336000  | -0.845653000 |
| H  | 1.957961000  | 1.449135000  | -1.657300000 |
| C  | -2.401667000 | -1.592895000 | -0.184578000 |
| C  | -2.840458000 | -0.223822000 | -0.226535000 |
| C  | -3.902051000 | 1.967006000  | -0.368104000 |
| C  | -2.580113000 | 4.387610000  | -0.480779000 |
| H  | -2.069809000 | 5.347452000  | -0.534924000 |
| C  | -4.658458000 | 3.135831000  | -0.448492000 |
| H  | -5.745483000 | 3.096068000  | -0.478044000 |
| C  | 1.040623000  | 2.654697000  | 1.253985000  |
| C  | -0.482707000 | -3.032693000 | -0.110420000 |
| H  | 0.591687000  | -3.193443000 | -0.049162000 |
| C  | 2.664286000  | 3.332847000  | -0.879128000 |
| H  | 3.298698000  | 3.546922000  | -1.735162000 |
| C  | 1.776513000  | 3.854515000  | 1.285794000  |
| H  | 1.709122000  | 4.480707000  | 2.172116000  |
| C  | -2.721870000 | -3.977214000 | -0.254371000 |
| H  | -3.371189000 | -4.846849000 | -0.326272000 |
| C  | -2.490686000 | 1.994783000  | -0.322347000 |
| C  | -3.260863000 | -2.699570000 | -0.247394000 |
| H  | -4.339095000 | -2.556066000 | -0.315226000 |
| C  | -1.332713000 | -4.134891000 | -0.187578000 |
| H  | -0.904953000 | -5.136429000 | -0.205982000 |
| C  | -3.982907000 | 4.348903000  | -0.497546000 |
| H  | -4.549107000 | 5.276261000  | -0.559323000 |
| C  | 2.579948000  | 4.200509000  | 0.214765000  |
| H  | 3.153822000  | 5.125716000  | 0.236412000  |
| Pt | 0.000000000  | 0.000000000  | 2.808247000  |
| S  | 2.046744000  | -1.026963000 | 0.126502000  |
| S  | -1.778394000 | -4.094351000 | 3.308742000  |
| N  | -0.236668000 | -2.045344000 | 3.089261000  |
| N  | 2.144596000  | 0.087825000  | 2.605273000  |
| C  | -1.985572000 | -0.069473000 | 3.004133000  |
| C  | 2.019138000  | -3.111663000 | 3.210181000  |
| H  | 2.556737000  | -2.173287000 | 3.159204000  |
| C  | 2.817210000  | 0.611872000  | 3.648656000  |
| H  | 2.208884000  | 0.997535000  | 4.464483000  |
| C  | -2.518129000 | -1.376710000 | 3.122793000  |
| C  | -1.509287000 | -2.401208000 | 3.146732000  |
| C  | -0.060773000 | -4.356472000 | 3.297059000  |
| C  | 2.698423000  | -4.317423000 | 3.307923000  |
| H  | 3.786692000  | -4.312814000 | 3.322264000  |
| C  | 0.621976000  | -5.568652000 | 3.391005000  |
| H  | 0.080469000  | -6.509150000 | 3.470409000  |
| C  | 2.829416000  | -0.353362000 | 1.526221000  |
| C  | -2.902725000 | 0.989491000  | 3.032176000  |
| H  | -2.553108000 | 2.015463000  | 2.933970000  |
| C  | 4.196553000  | 0.667211000  | 3.709344000  |
| H  | 4.682340000  | 1.092470000  | 4.583496000  |
| C  | 4.240278000  | -0.331176000 | 1.531032000  |
| H  | 4.763292000  | -0.697573000 | 0.650778000  |
| C  | -4.771979000 | -0.548062000 | 3.288596000  |
| H  | -5.839118000 | -0.717411000 | 3.413742000  |
| C  | 0.619859000  | -3.123622000 | 3.186298000  |
| C  | -3.892656000 | -1.620204000 | 3.252182000  |
| H  | -4.264157000 | -2.639766000 | 3.352842000  |
| C  | -4.268814000 | 0.753031000  | 3.181672000  |
| H  | -4.953891000 | 1.598819000  | 3.223571000  |
| C  | 2.010946000  | -5.537922000 | 3.389003000  |
| H  | 2.568622000  | -6.469726000 | 3.460564000  |
| C  | 4.924057000  | 0.165891000  | 2.623386000  |

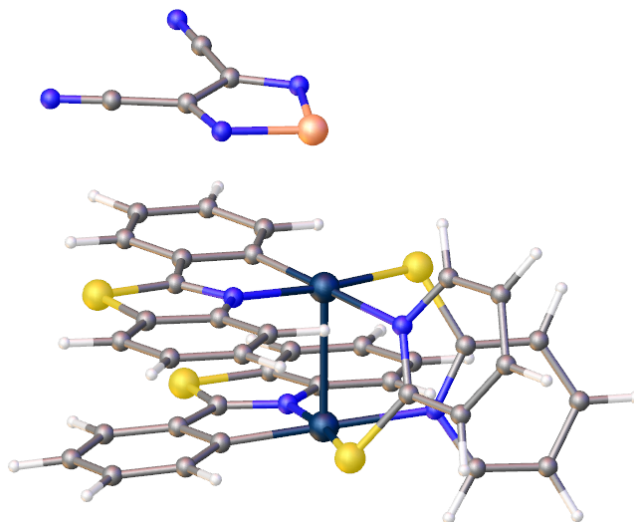



|    |              |              |              |
|----|--------------|--------------|--------------|
| H  | 6.012959000  | 0.184865000  | 2.625972000  |
| Se | -0.180692000 | -0.250915000 | -3.111707000 |
| N  | -1.951503000 | -0.235313000 | -3.230110000 |
| N  | -0.054602000 | -2.003888000 | -3.347898000 |
| N  | -4.857086000 | -2.079856000 | -3.433356000 |
| N  | -1.735585000 | -5.006756000 | -3.704736000 |
| C  | -1.283183000 | -2.472847000 | -3.430328000 |
| C  | -2.337984000 | -1.488375000 | -3.364901000 |
| C  | -3.730222000 | -1.810893000 | -3.415280000 |
| C  | -1.522712000 | -3.874831000 | -3.580601000 |

*Cartesian coordinate for [3-SeDA] (in Å)*

|    |              |              |              |
|----|--------------|--------------|--------------|
| Pt | 2.082298000  | 0.556024000  | 11.169880000 |
| S  | 4.244792000  | 0.602024000  | 10.547971000 |
| S  | -2.361727000 | 1.196076000  | 11.148711000 |
| O  | 2.793690000  | -0.568984000 | 12.791701000 |
| N  | 0.086550000  | 0.589194000  | 11.664207000 |
| N  | 4.066717000  | -0.891912000 | 12.756131000 |
| C  | -0.695186000 | 2.370834000  | 8.541851000  |
| H  | -1.777073000 | 2.504793000  | 8.573636000  |
| C  | -0.671538000 | 1.193393000  | 10.765095000 |
| C  | -2.019670000 | 0.319584000  | 12.618338000 |
| C  | -0.123558000 | -0.612920000 | 13.829490000 |
| H  | 0.948276000  | -0.785997000 | 13.899421000 |
| C  | -0.030791000 | 1.737268000  | 9.601461000  |
| C  | -0.632748000 | 0.081346000  | 12.726014000 |
| C  | -2.911110000 | -0.122120000 | 13.594915000 |
| H  | -3.979101000 | 0.066877000  | 13.506288000 |
| C  | 0.034899000  | 2.814140000  | 7.449675000  |
| H  | -0.464729000 | 3.301515000  | 6.614943000  |
| C  | 1.377131000  | 1.535066000  | 9.608175000  |
| C  | -1.015450000 | -1.052848000 | 14.798805000 |
| H  | -0.638039000 | -1.592679000 | 15.665511000 |
| C  | 1.421571000  | 2.619547000  | 7.428728000  |
| H  | 1.999171000  | 2.952374000  | 6.567129000  |
| C  | 2.080434000  | 1.997094000  | 8.486838000  |
| H  | 3.159251000  | 1.862878000  | 8.420344000  |
| C  | 5.835701000  | -2.107215000 | 13.780792000 |
| H  | 6.162290000  | -2.773512000 | 14.574435000 |
| C  | 4.519253000  | -1.717881000 | 13.730585000 |
| H  | 3.754693000  | -2.025769000 | 14.436887000 |
| C  | -2.393772000 | -0.811946000 | 14.686292000 |
| H  | -3.068999000 | -1.167092000 | 15.462509000 |
| C  | 4.890590000  | -0.415935000 | 11.779809000 |
| C  | 6.719894000  | -1.638921000 | 12.796513000 |
| H  | 7.764950000  | -1.940020000 | 12.800040000 |
| C  | 6.243135000  | -0.801117000 | 11.810443000 |
| H  | 6.886603000  | -0.435622000 | 11.014197000 |
| Se | 1.261770000  | -2.467382000 | 10.151793000 |
| N  | 1.435560000  | -1.714381000 | 8.551203000  |
| N  | 2.998974000  | -2.822515000 | 10.306014000 |
| N  | 6.156866000  | -2.493669000 | 8.969338000  |
| N  | 3.604862000  | -0.572604000 | 6.113505000  |
| C  | 3.587923000  | -2.318672000 | 9.248662000  |
| C  | 2.713281000  | -1.696329000 | 8.269418000  |
| C  | 5.007880000  | -2.414348000 | 9.093211000  |
| C  | 3.193289000  | -1.077538000 | 7.070896000  |

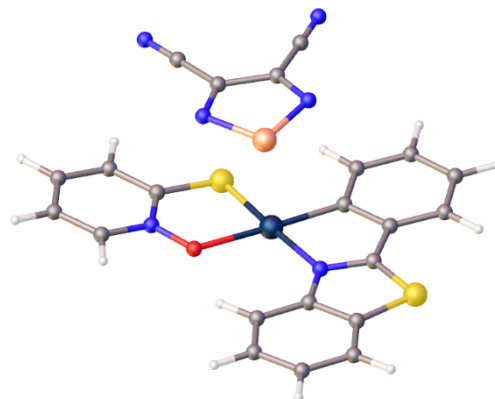

*Cartesian coordinate for [1-SeDA]<sub>σ</sub> (in Å)*

|    |                   |                   |                  |
|----|-------------------|-------------------|------------------|
| Pt | -0.45531719357297 | -0.55481193098488 | 4.26628195140136 |
| Pt | -0.62861331882767 | -0.87194641685794 | 7.15992267421354 |
| S  | -1.65773259097356 | -2.52007257470230 | 4.05258100887048 |
| S  | -1.99231604613848 | 0.98091783664298  | 7.21456616968048 |
| S  | 3.12528004807572  | 2.13828147315151  | 4.26579960782264 |
| S  | 3.17725182167580  | -3.24022924037962 | 7.29302244921078 |
| N  | 0.73556765043685  | -2.42432086784215 | 7.23467038773612 |
| N  | 0.77805481424324  | 1.09549911962218  | 4.35539942495233 |
| N  | -2.33333376046284 | 0.40144782963975  | 4.53765055160157 |
| N  | -2.36578128171924 | -1.98061125921616 | 6.66386626977475 |
| C  | 1.02632684909157  | 0.18045446243934  | 7.51958723193230 |
| N  | -4.09714163028910 | 1.27634607679701  | 5.50855190364344 |
| C  | 2.05725069290285  | 0.78449494431423  | 4.28043275750363 |
| C  | 0.55947553922114  | 2.45721721064626  | 4.38144920553287 |

|    |                   |                   |                   |
|----|-------------------|-------------------|-------------------|
| C  | 2.21715915013647  | -0.59086750251361 | 7.54385964966783  |
| C  | 1.30965162696017  | -1.46788354176006 | 4.06302623602089  |
| N  | -3.93167810083848 | -2.97260492867992 | 5.48731879162767  |
| C  | -2.81581697200044 | 0.85616442549197  | 5.69844220176737  |
| C  | 1.97968864028231  | -1.99795557526146 | 7.36838476064254  |
| C  | 2.42735402836834  | -0.59948316932213 | 4.13577715641482  |
| C  | 0.65785747363166  | -3.79300720217492 | 7.06613270464426  |
| C  | -0.66635932922562 | 3.13122723842112  | 4.39520633771761  |
| H  | -1.58925237950848 | 2.56551530503461  | 4.37866117678770  |
| C  | -3.32807291987589 | 0.51567780547645  | 3.59911587168703  |
| H  | -3.1809976319513  | 0.19811235359017  | 2.57435822792060  |
| C  | 1.18269592675321  | 1.56789416996575  | 7.65516547238785  |
| H  | 0.30701506407425  | 2.213388575532128 | 7.61322532781514  |
| C  | 3.48846419449512  | -0.01952221054541 | 7.68971874338472  |
| H  | 4.57928698691049  | -0.65041406082365 | 7.68595195087523  |
| C  | -3.45712007913262 | -2.16724098430373 | 7.47353903699120  |
| H  | -3.45800547612607 | -1.83244260160680 | 8.50328647231567  |
| C  | 3.74569230484724  | -1.06277732021251 | 4.04509710140435  |
| H  | 4.57928698691095  | -0.36317951693913 | 4.11307838410983  |
| C  | -2.66948596233945 | -2.46380930633673 | 5.45612445939403  |
| C  | -0.49437708955665 | -4.57562397354624 | 6.92785635759014  |
| H  | -1.46950468078050 | -4.10513526805049 | 6.97404774195293  |
| C  | 1.58150706386386  | -2.83143709193181 | 3.88885163597675  |
| H  | 0.75953057375863  | -3.54439873549331 | 3.84852365645062  |
| C  | -0.66734720353103 | 4.51852838395983  | 4.40801102405611  |
| H  | -1.61815925400035 | 5.04835014955523  | 4.41505071045733  |
| C  | 1.92315494829868  | -4.42056827698129 | 7.05467295511629  |
| C  | 2.06177603771621  | -5.79571621450477 | 6.87159281723421  |
| H  | 3.04548175837717  | -6.26098276817742 | 6.85818830690249  |
| C  | -4.43560014820296 | -2.79933772466728 | 6.75916030984344  |
| H  | -5.42701217071135 | -3.13566679115530 | 7.03543092489884  |
| C  | 1.75650900123631  | 3.20533976938127  | 4.35334091484549  |
| C  | 2.89271890583217  | -3.29592796090926 | 3.78521461046335  |
| H  | 3.06918060975150  | -4.36288701820704 | 3.64975241544191  |
| C  | 3.97966945703542  | -2.41908516161008 | 3.86361638335173  |
| H  | 4.99804660220887  | -2.79549428809662 | 3.78759968799812  |
| C  | -0.35649684902226 | -5.94461929217425 | 6.74741695064655  |
| H  | -1.24886102383264 | -6.55782664518988 | 6.63550569838320  |
| C  | 0.90757111101021  | -6.55271805300262 | 6.70964963446503  |
| H  | 0.98717830288669  | -7.62820305895962 | 6.56222709903164  |
| C  | 2.44399835284574  | 2.14145998286719  | 7.80903201980820  |
| H  | 2.52715891992349  | 3.22396679584444  | 7.90445203510461  |
| C  | -4.42753024049486 | 1.07428367909672  | 4.18514989340501  |
| H  | -5.39736566958063 | 1.34319265569290  | 3.78586286350002  |
| C  | 3.60275954288499  | 1.35589529318500  | 7.82667458583993  |
| H  | 4.58131600688712  | 1.81929123726753  | 7.93686396169247  |
| C  | 0.52974374467843  | 5.25040671141760  | 4.40176913805962  |
| H  | 0.49971141819586  | 6.33828751416778  | 4.40636759780448  |
| C  | -4.61586324629710 | -3.57382119101272 | 4.36986602494728  |
| H  | -4.21754090018918 | -3.14115993558082 | 3.44654741415592  |
| H  | -5.68682158315524 | -3.36288733354192 | 4.43978775155424  |
| H  | -4.46154601071339 | -4.65923535430732 | 4.34212256688451  |
| C  | -4.95496149671560 | 1.82151232052364  | 6.53058117339870  |
| H  | -4.62601870635677 | 1.43299887223448  | 7.49986574679769  |
| H  | -5.98819620197420 | 1.51413208741613  | 6.34447194807093  |
| H  | -4.90149920465186 | 2.91654342882474  | 6.55665889554916  |
| C  | 1.75632951637283  | 4.59926636129348  | 4.36871024445448  |
| H  | 2.68942103712112  | 5.15792353497476  | 4.33834121569836  |
| Se | -0.50154390759086 | -0.39522628239734 | 1.35834282358399  |
| N  | 0.56699352114694  | 1.04257967924980  | 1.51711152070896  |
| N  | -0.75637266696558 | -0.03562326171114 | -0.42200893119556 |
| C  | -0.09649140832340 | 1.04336468416317  | -0.72606726511765 |
| N  | -0.15195874749579 | 2.05489769167623  | -3.11401964947122 |
| C  | 0.65764199131470  | 1.64431790229711  | 0.36652188774519  |
| C  | -0.12996771660510 | 1.59732289613922  | -2.05006369286629 |
| N  | 2.09453028450112  | 3.79033561774573  | 0.15256764518179  |
| C  | 1.45294517730786  | 2.83045372214312  | 0.24657557114560  |

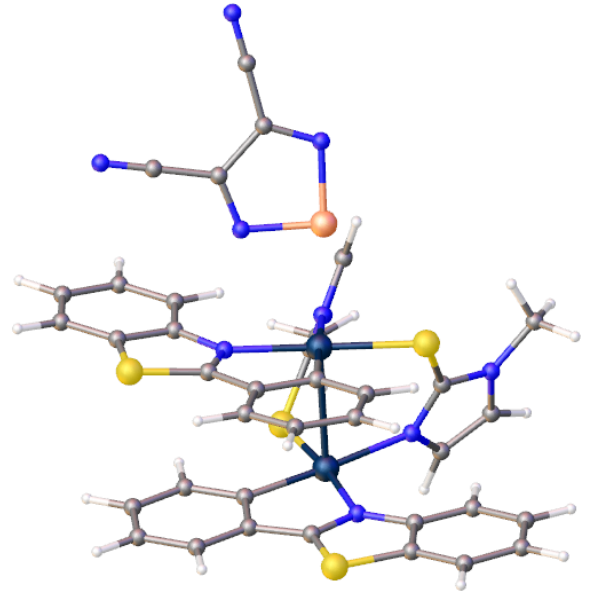

## 4. NMR data

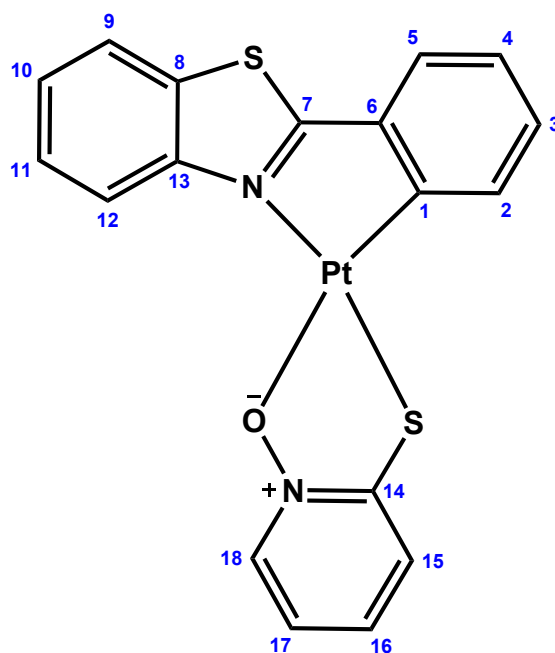

**Figure S17.** Complex numbering scheme as key for the attribution of the NMR spectra.

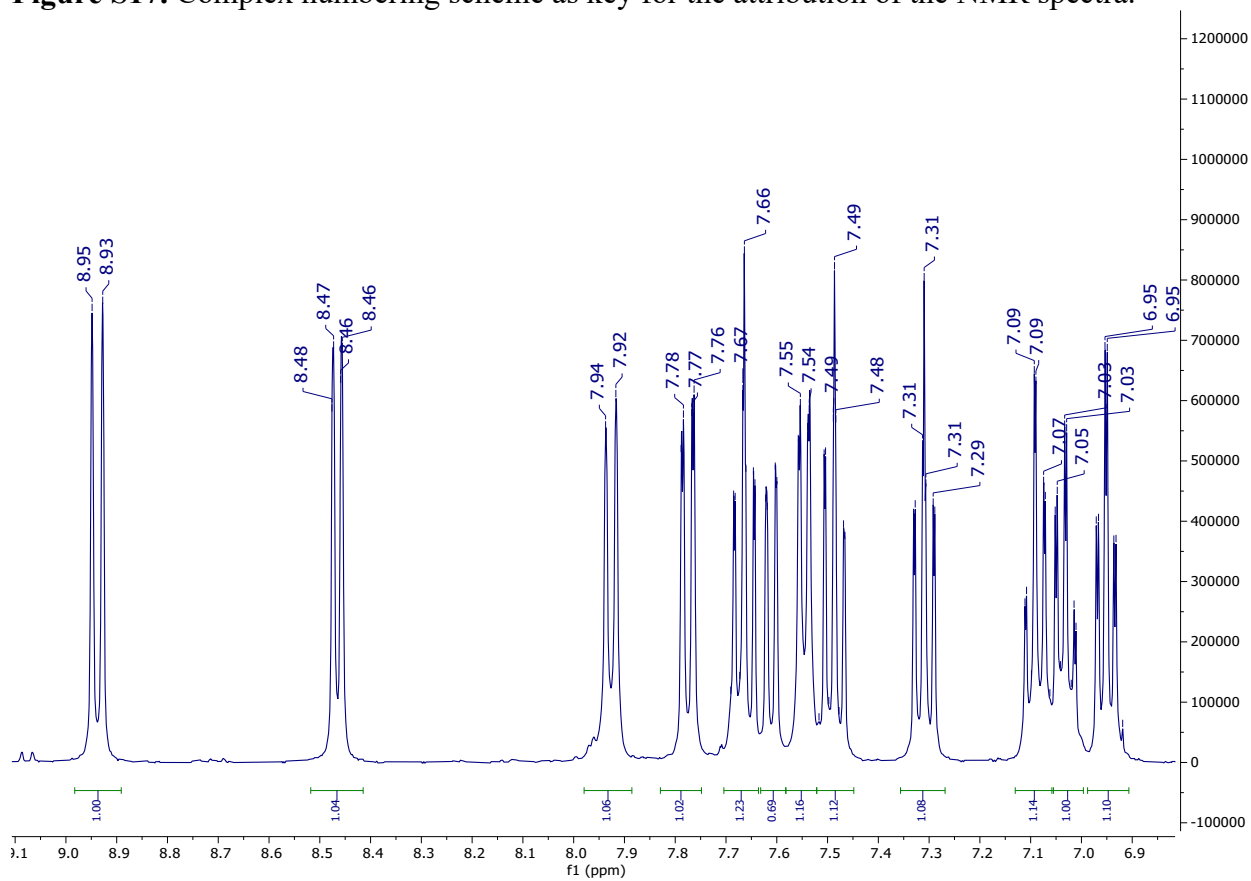

**Figure S18.** <sup>1</sup>H NMR spectrum of **3** in CD<sub>2</sub>Cl<sub>2</sub>.

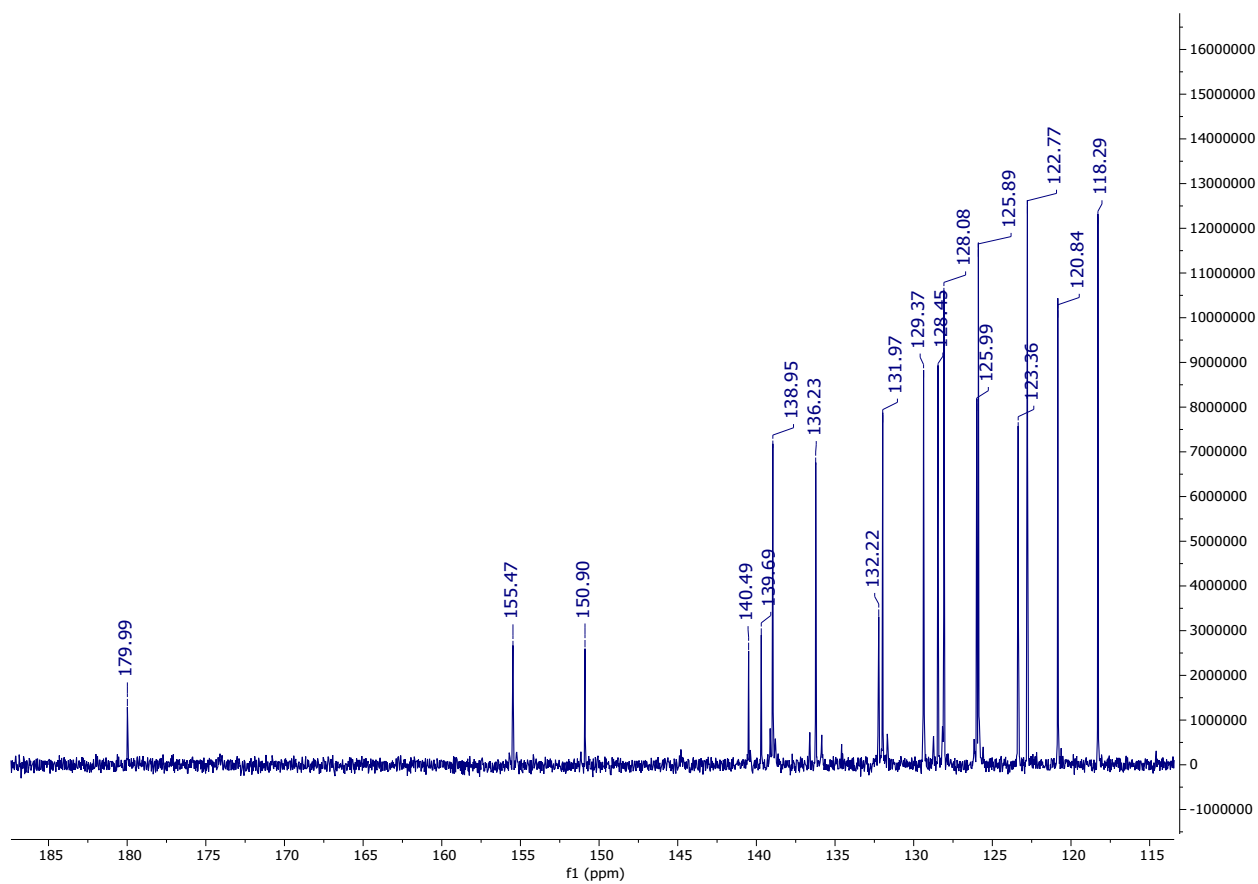

Figure S19.  $^{13}\text{C}$  NMR spectrum of **3** in  $\text{CD}_2\text{Cl}_2$ .

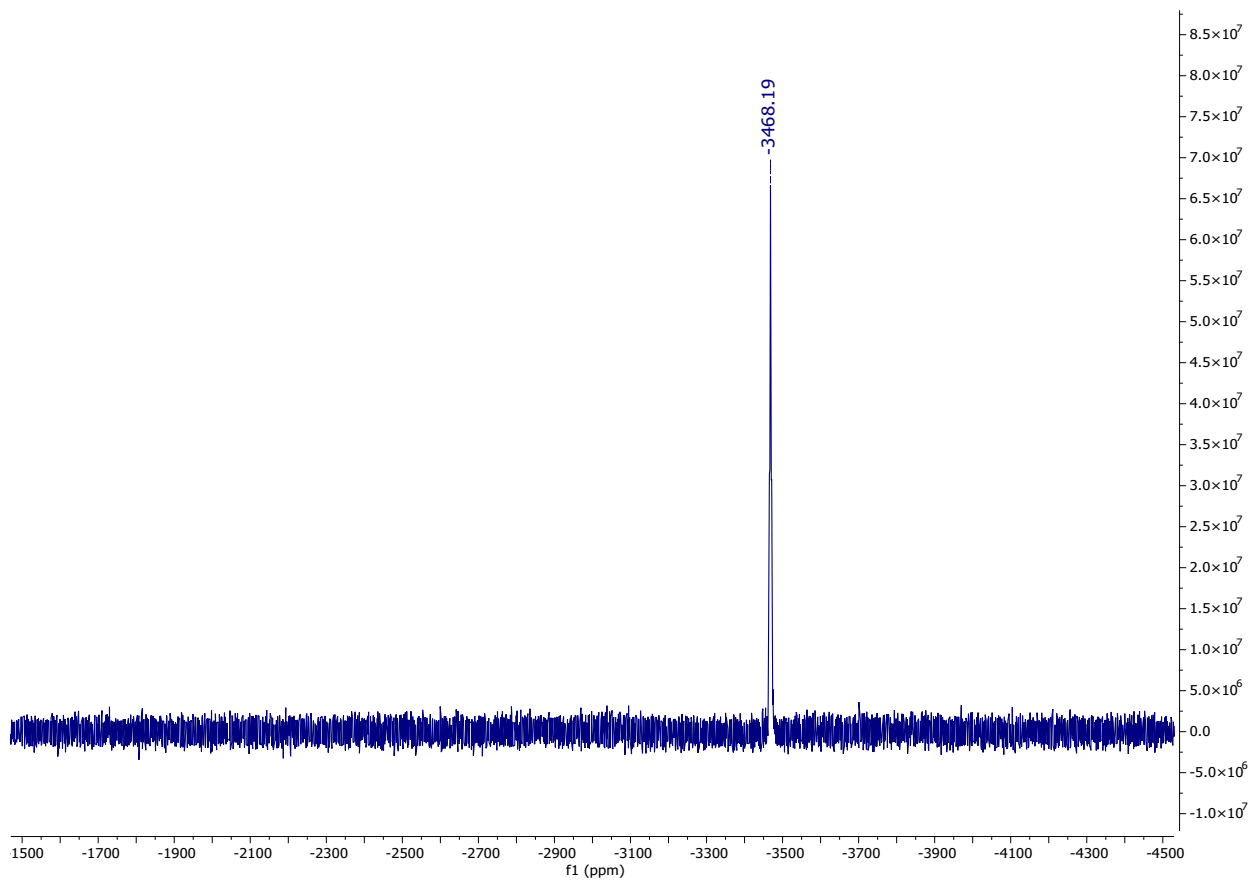

Figure S20.  $^{195}\text{Pt}$  NMR spectrum of **3** in  $\text{CD}_2\text{Cl}_2$ .

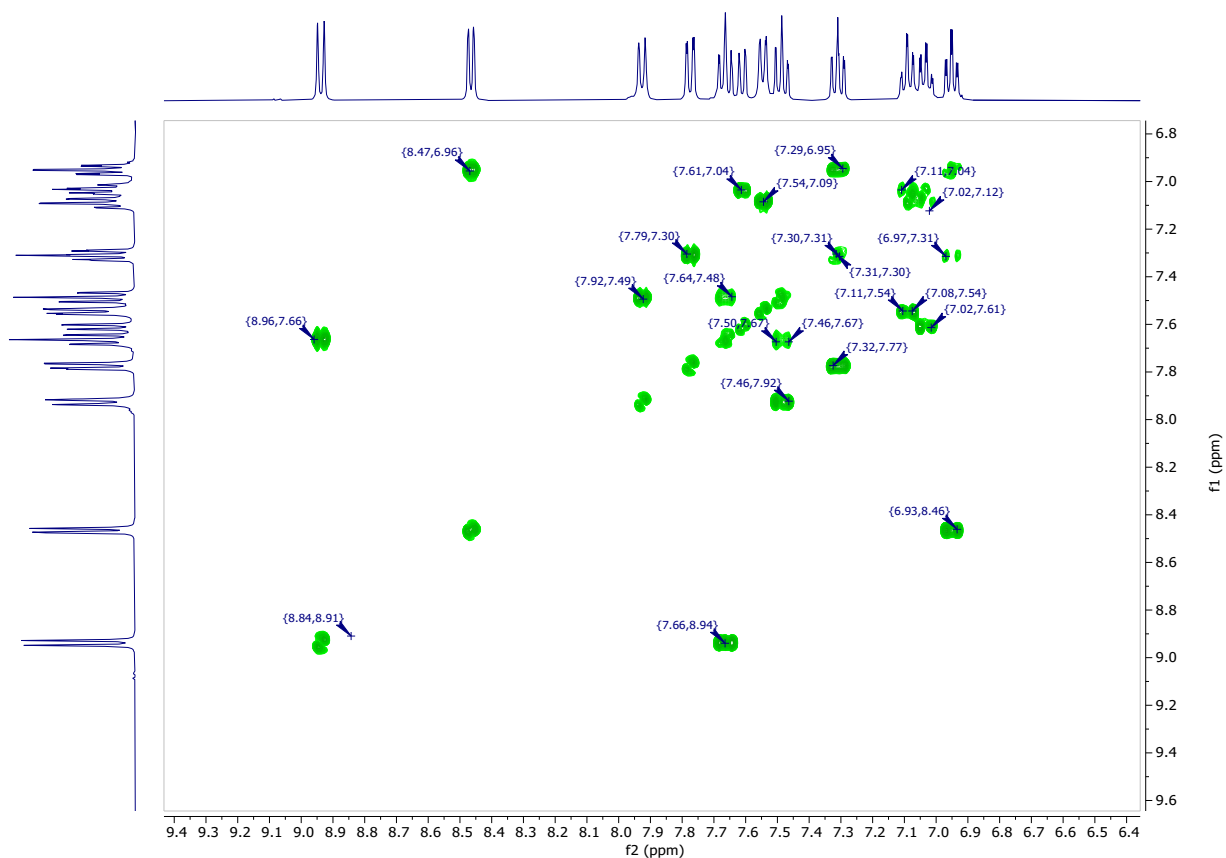

**Figure S21.** The  $^1\text{H}$ - $^1\text{H}$  COSY spectrum for **3** in  $\text{CD}_2\text{Cl}_2$ .

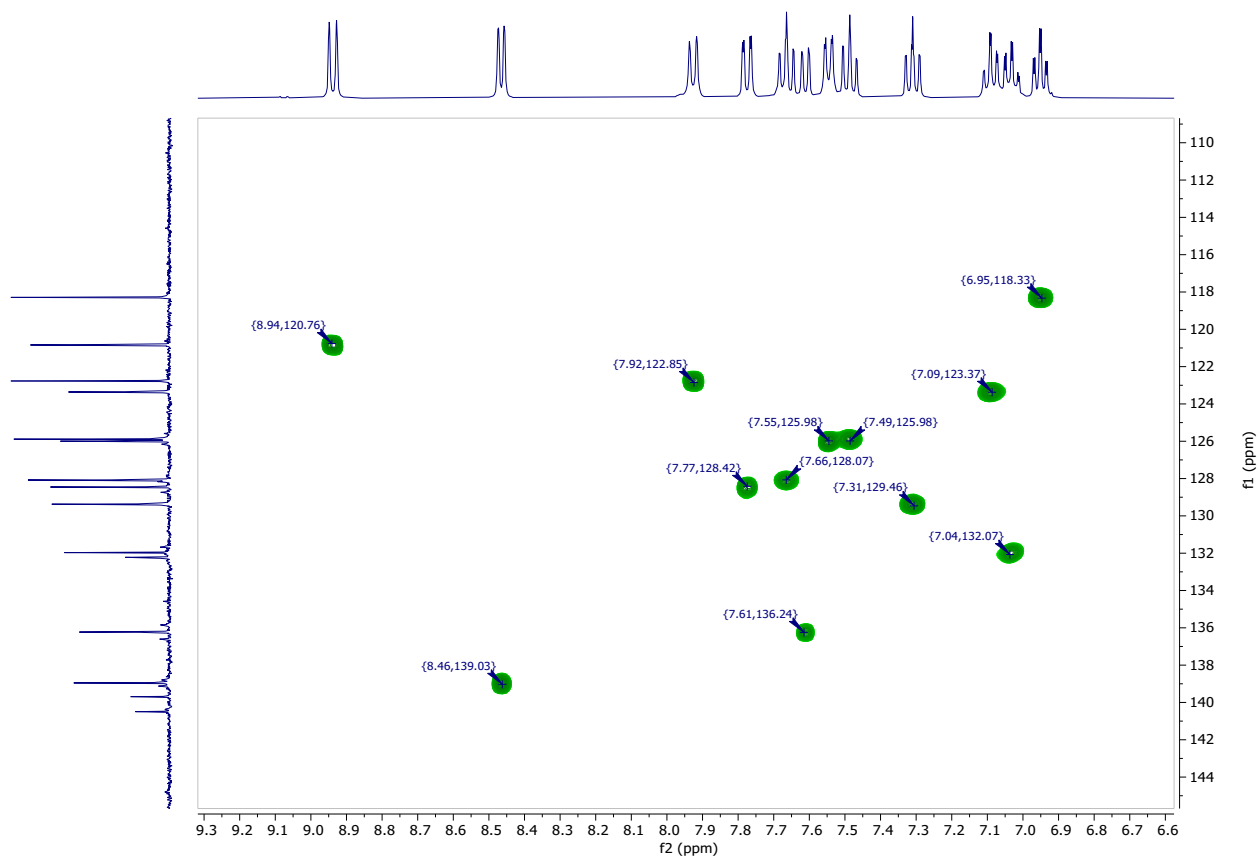

**Figure S22.** The  $^1\text{H}$ - $^{13}\text{C}$  HSQC spectrum for **3** in  $\text{CD}_2\text{Cl}_2$ .

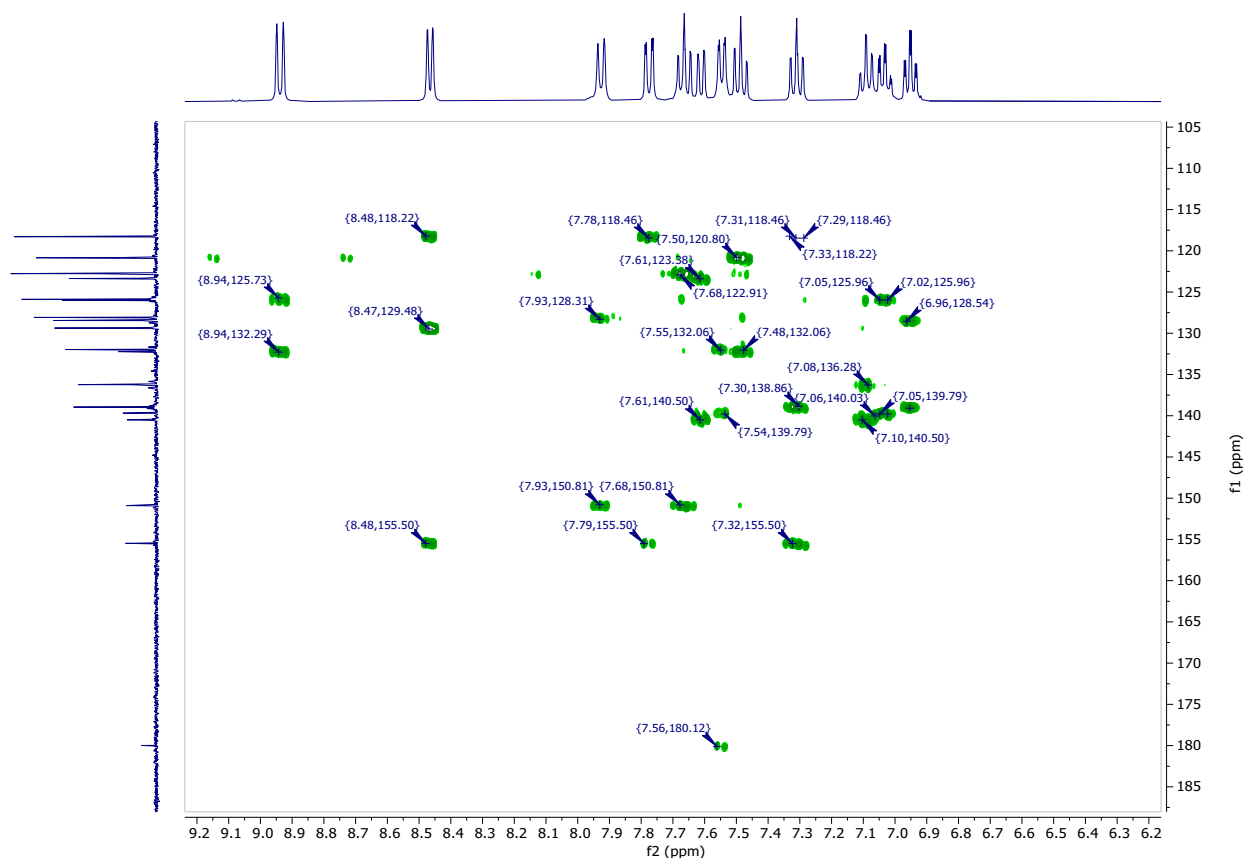

**Figure S23.** The  $^1\text{H}$ - $^{13}\text{C}$  HMBC spectrum for **3** in  $\text{CD}_2\text{Cl}_2$ .

## 5. References

1. E. Espinosa, E. Molins and C. Lecomte, Hydrogen bond strengths revealed by topological analyses of experimentally observed electron densities, *Chem. Phys. Lett.*, 1998, **285**, 170-173.
2. P. Politzer, J. S. Murray and T. Clark, The  $\pi$ -hole revisited, *Physical Chemistry Chemical Physics*, 2021, **23**, 16458-16468.
3. P. Politzer and J. Murray, An Overview of Strengths and Directionalities of Noncovalent Interactions:  $\sigma$ -Holes and  $\pi$ -Holes, *Crystals*, 2019, **9**, 165.
4. A. F. Cozzolino, I. Vargas-Baca, S. Mansour and A. H. Mahmoudkhani, The Nature of the Supramolecular Association of 1,2,5-Chalcogenadiazoles, *Journal of the American Chemical Society*, 2005, **127**, 3184-3190.
5. M. A. A. Ibrahim and E. M. Z. Telb,  $\sigma$ -Hole and Lone-Pair Hole Interactions in Chalcogen-Containing Complexes: A Comparative Study, *ACS Omega*, 2020, **5**, 21631-21640.
6. N. Tarannam, R. Shukla and S. Kozuch, Yet another perspective on hole interactions, *Physical Chemistry Chemical Physics*, 2021, **23**, 19948-19963.
